1 A model species for agricultural pest genomics: the genome of the Colorado potato beetle,  
2 *Leptinotarsa decemlineata* (Coleoptera: Chrysomelidae)

3  
4 Sean D. Schoville<sup>1\*</sup>, Yolanda H. Chen<sup>2</sup>, Martin N. Andersson<sup>3</sup>, Joshua B. Benoit<sup>4</sup>, Anita  
5 Bhandari<sup>5</sup>, Julia H. Bowsher<sup>6</sup>, Kristian Brevik<sup>2</sup>, Kaat Cappelle<sup>7</sup>, Mei-Ju M. Chen<sup>8</sup>, Anna K.  
6 Childers<sup>9,10</sup>, Christopher Childers<sup>8</sup>, Olivier Christiaens<sup>7</sup>, Justin Clements<sup>1</sup>, Elise M. Didion<sup>4</sup>,  
7 Elena N. Elpidina<sup>11</sup>, Patamarerk Engsontia<sup>12</sup>, Markus Friedrich<sup>13</sup>, Inmaculada García-Robles<sup>14</sup>,  
8 Richard A. Gibbs<sup>15</sup>, Chandan Goswami<sup>16</sup>, Alessandro Grapputo<sup>17</sup>, Kristina Gruden<sup>18</sup>, Marcin  
9 Grynberg<sup>19</sup>, Bernard Henrissat<sup>20,21,22</sup>, Emily C. Jennings<sup>4</sup>, Jeffery W. Jones<sup>13</sup>, Megha Kalsi<sup>23</sup>,  
10 Sher A. Khan<sup>24</sup>, Abhishek Kumar<sup>25,26</sup>, Fei Li<sup>27</sup>, Vincent Lombard<sup>20,21</sup>, Xingzhou Ma<sup>27</sup>,  
11 Alexander Martynov<sup>28</sup>, Nicholas J. Miller<sup>29</sup>, Robert F. Mitchell<sup>30</sup>, Monica Munoz-Torres<sup>31</sup>, Anna  
12 Muszewska<sup>19</sup>, Brenda Oppert<sup>32</sup>, Subba Reddy Palli<sup>23</sup>, Kristen A. Panfilio<sup>33,34</sup>, Yannick Pauchet<sup>35</sup>,  
13 Lindsey C. Perkin<sup>32</sup>, Marko Petek<sup>18</sup>, Monica F. Poelchau<sup>8</sup>, Éric Record<sup>36</sup>, Joseph P. Rinehart<sup>10</sup>,  
14 Hugh M. Robertson<sup>37</sup>, Andrew J. Rosendale<sup>4</sup>, Victor M. Ruiz-Arroyo<sup>14</sup>, Guy Smagghe<sup>7</sup>, Zsofia  
15 Szendrei<sup>38</sup>, Gregg W.C. Thomas<sup>39</sup>, Alex S. Torson<sup>6</sup>, Iris M. Vargas Jentzsch<sup>33</sup>, Matthew T.  
16 Weirauch<sup>40,41</sup>, Ashley D. Yates<sup>42,43</sup>, George D. Yocum<sup>10</sup>, June-Sun Yoon<sup>23</sup>, Stephen Richards<sup>15</sup>

17 1 Department of Entomology, University of Wisconsin-Madison  
18 2 Department of Plant and Soil Sciences, University of Vermont  
19 3 Department of Biology, Lund University  
20 4 Department of Biological Sciences, University of Cincinnati  
21 5 Department of Molecular Physiology, Christian-Albrechts-University at Kiel  
22 6 Department of Biological Sciences, North Dakota State University  
23 7 Department of Crop Protection, Ghent University  
24 8 USDA-ARS National Agricultural Library, Beltsville, MD USA  
25 9 USDA-ARS Bee Research Lab, Beltsville, MD USA  
26 10 USDA-ARS Insect Genetics and Biochemistry Research Unit, Fargo, ND USA  
27 11 A.N. Belozersky Institute of Physico-Chemical Biology, Lomonosov Moscow State University  
28 12 Department of Biology, Faculty of Science, Prince of Songkla University, Thailand  
29 13 Department of Biological Sciences, Wayne State University  
30 14 Department of Genetics, University of Valencia  
31 15 Department of Molecular and Human Genetics, Baylor College of Medicine  
32 16 National Institute of Science Education and Research, Bhubaneswar, India  
33 17  
34 18 Department of Biotechnology and Systems Biology, National Institute of Biology, Slovenia  
35 19 Institute of Biochemistry and Biophysics, Polish Academy of Sciences  
36 20 Architecture et Fonction des Macromolécules Biologiques, CNRS, Aix-Marseille Université, 13288  
37 Marseille, France  
38 21 INRA, USC 1408 AFMB, F-13288 Marseille, France  
39 22 Department of Biological Sciences, King Abdulaziz University, Saudi Arabia  
40 23 Department of Entomology, University of Kentucky  
41 24 Department of Entomology, Texas A&M University, College Station  
42 25 Department of Genetics & Molecular Biology in Botany, Christian-Albrechts-University at Kiel  
43 26 Division of Molecular Genetic Epidemiology, German Cancer Research Center, Heidelberg  
44 27 Department of Entomology, Nanjing Agricultural University  
45 28 Center for Data-Intensive Biomedicine and Biotechnology, Skolkovo Institute of Science and Technology  
46 29 Department of Biology, Illinois Institute of Technology  
47 30 Department of Biology, University of Wisconsin-Oshkosh  
48 31 Environmental Genomics and Systems Biology Division, Lawrence Berkeley National Laboratory  
49 32 USDA-ARS Center for Grain and Animal Health Research  
50 33 Institute for Developmental Biology, University of Cologne  
51 34 School of Life Sciences, University of Warwick, Gibbet Hill Campus

- 52 35 Department of Entomology, Max Planck Institute for Chemical Ecology, Jena, Germany  
53 36 INRA, Aix-Marseille Université, UMR1163, Biodiversité et Biotechnologie Fongiques, Marseille, France  
54 37 Department of Entomology, University of Illinois at Urbana-Champaign  
55 38 Department of Entomology, Michigan State University  
56 39 Department of Biology and School of Informatics and Computing, Indiana University  
57 40 Center for Autoimmune Genomics and Etiology, Division of Biomedical Informatics and Division of  
58 Developmental Biology, Cincinnati Children's Hospital Medical Center.  
59 41 Department of Pediatrics, University of Cincinnati College of Medicine.  
60 42 Department of Entomology, The Ohio State University  
61 43 Center for Applied Plant Sciences, The Ohio State University

62  
63 \*Corresponding Author: Sean Schoville, University of Wisconsin-Madison, Department of  
64 Entomology, 1630 Linden Drive, Madison, WI 53706; [sean.schoville@wisc.edu](mailto:sean.schoville@wisc.edu); +1-608-262-  
65 2956  
66

67 **Abstract**

68 The Colorado potato beetle is one of the most challenging agricultural pests to manage. It has  
69 shown a spectacular ability to adapt to a variety of solanaceaeous plants and variable climates  
70 during its global invasion, and, notably, to rapidly evolve insecticide resistance. To examine  
71 evidence of rapid evolutionary change, and to understand the genetic basis of herbivory and  
72 insecticide resistance, we tested for structural and functional genomic changes relative to other  
73 arthropod species using genome sequencing, transcriptomics, and community annotation. Two  
74 factors that might facilitate rapid evolutionary change include transposable elements, which  
75 comprise at least 17% of the genome and are rapidly evolving compared to other Coleoptera, and  
76 high levels of nucleotide diversity in rapidly growing pest populations. Adaptations to plant  
77 feeding are evident in gene expansions and differential expression of digestive enzymes in gut  
78 tissues, as well as expansions of gustatory receptors for bitter tasting. Surprisingly, the suite of  
79 genes involved in insecticide resistance is similar to other beetles. Finally, duplications in the  
80 RNAi pathway might explain why *Leptinotarsa decemlineata* has high sensitivity to dsRNA.  
81 The *L. decemlineata* genome provides opportunities to investigate a broad range of phenotypes  
82 and to develop sustainable methods to control this widely successful pest.

83

84 **Keywords:** insects; evolution; pesticide resistance; herbivory; plant-insect interactions; pest  
85 management; whole-genome sequence

86

## 87 **Introduction**

88           The Colorado potato beetle, *Leptinotarsa decemlineata* Say 1824 (Coleoptera:  
89 Chrysomelidae), is widely considered one of the world's most successful globally-invasive insect  
90 herbivores, with costs of ongoing management reaching tens of millions of dollars annually [1]  
91 and projected costs if unmanaged reaching billions of dollars [2]. This beetle was first identified  
92 as a pest in 1859 in the Midwestern United States, after it expanded from its native host plant,  
93 *Solanum rostratum* (Solanaceae), onto potato (*S. tuberosum*) [3]. As testimony to the difficulty in  
94 controlling *L. decemlineata*, the species has the dubious honor of starting the pesticide industry,  
95 when Paris Green (copper (II) acetoarsenite) was first applied to control it in the United States in  
96 1864 [4]. *Leptinotarsa decemlineata* is now widely recognized for its ability to rapidly evolve  
97 resistance to insecticides, as well as a wide range of abiotic and biotic stresses [5], and for its  
98 global expansion across 16 million km<sup>2</sup> to cover the entire Northern Hemisphere within the 20th  
99 century [6]. Over the course of 150 years of research, *L. decemlineata* has been the subject in  
100 more than 9,700 publications (according to the Web of Science™ Core Collection of databases)  
101 ranging from molecular to organismal biology from the fields of agriculture, entomology,  
102 molecular biology, ecology, and evolution.

103           In order to be successful, *L. decemlineata* evolved to exploit novel host plants, to inhabit  
104 colder climates at higher latitudes [7–9], and to cope with a wide range of novel environmental  
105 conditions in agricultural landscapes [10,11]. Genetic data suggest the potato-feeding pest  
106 lineage directly descended from populations that feed on *S. rostratum* in the U.S. Great Plains  
107 [12]. This beetle subsequently expanded its range northwards, shifting its life history strategies to  
108 exploit even colder climates [7,8,13], and steadily colonized potato crops despite substantial  
109 geographical barriers [14]. *Leptinotarsa decemlineata* is an excellent model for understanding

110 pest evolution in agroecosystems because, despite its global spread, individuals disperse over  
111 short distances and populations often exhibit strong genetic differentiation [15–17], providing an  
112 opportunity to track the spread of populations and the emergence of novel phenotypes. The  
113 development of genomic resources in *L. decemlineata* will provide an unparalleled opportunity  
114 to investigate the molecular basis of traits such as climate adaptation, herbivory, host expansion,  
115 and chemical detoxification. Perhaps most significantly, understanding its ability to evolve  
116 rapidly would be a major step towards developing sustainable methods to control this widely  
117 successful pest in agricultural settings.

118         Given that climate is thought to be the major factor in structuring the range limits of  
119 species [18], the latitudinal expansion of *L. decemlineata*, spanning more than 40° latitude from  
120 Mexico to northern potato-producing countries such as Canada and Russia [6], warrants further  
121 investigation. Harsh winter climates are thought to present a major barrier for insect range  
122 expansions, especially near the limits of a species' range [7,19]. To successfully overwinter in  
123 temperate climates, beetles need to build up body mass, develop greater amounts of lipid storage,  
124 have a low resting metabolism, and respond to photoperiodic keys by initiating diapause [20,21].  
125 Although the beetle has been in Europe for less than 100 years, local populations have  
126 demonstrating remarkably rapid evolution in life history traits linked to growth, diapause and  
127 metabolism [8,13,20]. Understanding the genetic basis of these traits, particularly the role of  
128 specific genes associated with metabolism, fatty acid synthesis, and diapause induction, could  
129 provide important information about the mechanism of climate adaptation.

130         Although *Leptinotarsa decemlineata* has long-served as a model for the study of host  
131 expansion and herbivory due to its rapid ability to host switch [17,22], a major outstanding  
132 question is what genes and biological pathways are associated with herbivory in this species?

133 While >35,000 species of Chrysomelidae are well-known herbivores, most species feed on one  
134 or a few host species within the same plant family [23]. Within *Leptinotarsa*, the majority of  
135 species feed on plants within Solanaceae and Asteraceae, while *L. decemlineata* feeds  
136 exclusively on solanaceous species [24]. It has achieved the broadest host range amongst its  
137 congeners (including, but not limited to: buffalobur (*S. rostratum*), potato (*S. tuberosum*),  
138 eggplant (*S. melongena*), silverleaf nightshade (*S. elaeagnifolium*), horsenettle (*S. carolinense*),  
139 bittersweet nightshade (*S. dulcamara*), tomato (*S. lycopersicum*), and tobacco (*Nicotiana*  
140 *tabacum*)) [17,22,25], and exhibits geographical variation in the use of locally abundant *Solanum*  
141 species [26].

142 Another major question is what are the genes that underlie the beetle's remarkable  
143 capacity to detoxify plant secondary compounds and are these the same biological pathways used  
144 to detoxify insecticidal compounds [27]? Solanaceous plants are considered highly toxic to a  
145 wide range of insect herbivore species [28], because they contain steroidal alkaloids and  
146 glycoalkaloids, nitrogen-containing compounds that are toxic to a wide range of organisms,  
147 including bacteria, fungi, humans, and insects [29], as well as glandular trichomes that contain  
148 additional toxic compounds [30]. In response to beetle feeding, potato plants upregulate  
149 pathways associated with terpenoid, alkaloid, and phenylpropanoid biosynthesis, as well as a  
150 range of protease inhibitors [31]. A complex of digestive cysteine proteases is known to underlie  
151 *L. decemlineata*'s ability to respond to potato-induced defenses [32,33]. There is evidence that  
152 larvae excrete [34] and perhaps even sequester toxic plant-based compounds in the hemolymph  
153 [35,36]. Physiological mechanisms involved in detoxifying plant compounds, as well as other  
154 xenobiotics, have been proposed to underlie pesticide resistance [27]. To date, while cornerstone  
155 of *L. decemlineata* management has been the use of insecticides, the beetle has evolved

156 resistance to over 50 compounds and all of the major classes of insecticides. Some of these  
157 chemicals have even failed to control *L. decemlineata* within the first year of release [10], and  
158 notably, regional populations of *L. decemlineata* have demonstrated the ability to independently  
159 evolve resistance to pesticides and to do so at different rates [37]. Previous studies have  
160 identified target site mutations in resistance phenotypes and a wide range of genes involved in  
161 metabolic detoxification, including carboxylesterase genes, cytochrome P450s, and glutathione  
162 S-transferase genes [38–42].

163         To examine evidence of rapid evolutionary change underlying *L. decemlineata*'s  
164 extraordinary success utilizing novel host plants, climates, and detoxifying insecticides, we  
165 evaluated structural and functional genomic changes relative to other beetle species, using  
166 whole-genome sequencing, transcriptome sequencing, and a large community-driven biocuration  
167 effort to improve predicted gene annotations. We compared the size of gene families associated  
168 with particular traits against existing available genomes from related species, particularly those  
169 sequenced by the i5k project (<http://i5k.github.io>), an initiative to sequence 5,000 species of  
170 Arthropods. While efforts have been made to understand the genetic basis of phenotypes in *L.*  
171 *decemlineata* (for example, pesticide resistance) [32,43,44], previous work has been limited to  
172 candidate gene approaches rather than comparative genomics. Genomic data can not only  
173 illuminate the genetic architecture of a number of phenotypic traits that enable *L. decemlineata*  
174 to continue to be an agricultural pest, but can also be used to identify new gene targets for  
175 control measures. For example, recent efforts have been made to develop RNAi-based pesticides  
176 targeting critical metabolic pathways in *L. decemlineata* [41,45,46]. With the extensive wealth of  
177 biological knowledge and a newly-released genome, this beetle is well-positioned to be a model  
178 system for agricultural pest genomics and the study of rapid evolution.

179

## 180 **Results and Discussion**

### 181 **Genome Assembly, Annotation and Assessment**

182 A single female *L. decemlineata* from Long Island, NY, USA, a population known to be  
183 resistant to a wide range of insecticides [47,48], was sequenced to a depth of ~140x coverage and  
184 assembled with ALLPATHS [49] followed by assembly improvement with ATLAS  
185 (<https://www.hgsc.bcm.edu/software/>). The average coleopteran genome size is 760 Mb (ranging  
186 from 160-5,020 Mb [50]), while most of the beetle genome assemblies have been smaller (mean  
187 assembly size 286 Mb, range 160-710 Mb) [51-55]. The draft genome assembly of *L.*  
188 *decemlineata* is 1.17 Gb and consists of 24,393 scaffolds, with a N50 of 414 kb and a contig N50  
189 of 4.9 kb. This assembly is more than twice the estimated genome size of 460 Mb [56], with the  
190 presence of gaps comprising 492 Mb, or 42%, of the assembly. As this size might be driven by  
191 underlying heterozygosity, we also performed scaffolding with REDUNDANS [57], which  
192 reduced the assembly size to 642 Mb, with gaps reduced to 1.3% of the assembly. However, the  
193 REDUNDANS assembly increased the contig N50 to 47.4 kb, the number of scaffolds increased  
194 to 90,205 and the N50 declined to 139 kb. By counting unique 19 bp kmers and adjusting for  
195 ploidy, we estimate the genome size as 816.9 Mb. Using just the small-insert (180 bp) 100 bp PE  
196 reads, average coverage was 24X for the ALLPATHS assembly and 26X for the REDUNDANS  
197 assembly. For all downstream analyses, the ALLPATHS assembly was used due to its increased  
198 scaffold length and reduced number of scaffolds.

199 The number of genes in the *L. decemlineata* genome predicted based on automated  
200 annotation using MAKER was 24,671 gene transcripts, with 93,782 predicted exons, which  
201 surpasses the 13,526-22,253 gene models reported in other beetle genome projects (**Figure 1**)



202 [51-55]. This may be in part due to fragmentation of the genome, which is known to inflate gene  
203 number estimates [58]. To improve our gene models, we manually annotated genes using expert  
204 opinion and additional mRNA resources (see **Supplementary File** for more details). A total of  
205 1,364 genes were manually curated and merged with the unedited MAKER annotations to  
206 produce an official gene set (OGS v1.0) of 24,850 transcripts, comprised of 94,859 exons. A  
207 total of 12 models were curated as pseudogenes. A total of 1,237 putative transcription factors  
208 (TFs) were identified in the *L. decemlineata* predicted proteome (**Figure 2**). The predicted  
209 number of TFs is similar to some beetles, such as *Anoplophora glabripennis* (1,397) and  
210 *Hypothenemus hampei* (1,148), but substantially greater than others, such as *Tribolium*  
211 *castaneum* (788), *Nicrophorus vespilloides* (744), and *Dendroctonus ponderosae* (683) [51-55].

212 We assessed the completeness of both the ALLPATHS and REDUNDANS assemblies,  
213 and the OGS separately, using benchmarking sets of universal single-copy orthologs (BUSCOs)  
214 based on 35 holometabolous insect genomes [59], as well as manually assessing the  
215 completeness and co-localization of the homeodomain transcription factor gene clusters in the  
216 ALLPATHS assembly. Using the reference set of 2,442 BUSCOs, the ALLPATHS genome  
217 assembly, REDUNDANS genome assembly, and OGS were 93.0%, 91.9%, and 71.8%  
218 complete, respectively. We found an additional 4.1%, 5.4%, and 17.9% of the BUSCOs present  
219 but fragmented in each dataset, respectively. For the highly conserved Hox and Iroquois  
220 Complex (Iro-C) clusters, we located and annotated complete gene models in the ALLPATHS  
221 genome assembly for all 12 expected orthologs, but these were split across six different scaffolds  
222 (**Supplementary Figure 1S** and **Table 1S**). All linked Hox genes occurred in the expected order  
223 and with the expected, shared transcriptional orientation, suggesting that the current draft  
224 assembly was correct but incomplete (see also **Supplementary Figures 2S** and **3S**). Assuming

225 direct concatenation of scaffolds, the Hox cluster would span a region of 3.7 Mb, similar to the  
226 estimated 3.5 Mb Hox cluster of *A. glabripennis* [54]. While otherwise highly conserved with *A.*  
227 *glabripennis*, we found a tandem duplication for *Hox3/zen* and an Antennapedia-class (ANTP-  
228 class) homeobox gene with no clear ortholog in other arthropods. We also assessed the  
229 ALLPATHS genome assembly for evidence of contamination using a Blobplot (**Supplementary**  
230 **Figure 4S**), which identified a small proportion of the reads (5.9%) as putative contaminants (the  
231 largest single taxonomic group represented, 2.6%, was assigned to Annelida).

232

### 233 **Gene Annotation, Gene Family Evolution and Differential Expression**

234 We estimated a phylogeny among six coleopteran genomes (*A. glabripennis*, *Agrilus*  
235 *planipennis*, *D. ponderosae*, *L. decemlineata*, *Onthophagus taurus*, and *T. castaneum*;  
236 unpublished genomes available at <http://i5k.github.io/>) [51,52,54] using a conserved set of single  
237 copy orthologs and compared the official gene set of each species to understand how gene  
238 families evolved the branch representing Chysomelidae. *Leptinotarsa decemlineata* and *A.*  
239 *glabripennis* (Cerambycidae) are sister taxa (**Figure 1**), as expected for members of the same  
240 superfamily Chrysomeloidea. We found 166 rapidly evolving gene families along the *L.*  
241 *decemlineata* lineage (1.4% of 11,598), 142 of which are rapid expansions and the remaining 24  
242 rapid contractions (**Table 1**). Among all branches of our coleopteran phylogeny, *L. decemlineata*  
243 has the highest average expansion rate (0.203 genes per million years), the highest number of  
244 genes gained, and the greatest number of rapidly evolving gene families.

245 Examination of the functional classification of rapidly evolving families in *L.*  
246 *decemlineata* (**Supplementary Tables 2S** and **3S**) indicates that a subset of families are clearly  
247 associated with herbivory. The peptidases, comprising several gene families that play a major

248 role in plant digestion [32,60], displayed a significant expansion in genes (OrthoDB family Id:  
249 EOG8JDKNM, EOG8GTNV8, EOG8DRCSN, EOG8GTNT0, EOG8K0T47, EOG88973C,  
250 EOG854CDR, EOG8Z91BB, EOG80306V, EOG8CZF0X, EOG80P6ND, ,EOG8BCH22,  
251 EOG8ZKN28, EOG8F4VSG, EOG80306V, EOG8BCH22, EOG8ZKN28, EOG8F4VSG).  
252 While olfactory receptor gene families have rapidly contracted (EOG8Q5C4Z, EOG8RZ1DX),  
253 subfamilies of odorant binding proteins and gustatory receptors have grown (see Sensory  
254 Ecology section below). The expansion of gustatory receptor subfamilies are associated with  
255 bitter receptors, likely reflecting host plant detection of nightshades (Solanaceae). Some gene  
256 families associated with plant detoxification and insecticide resistance have rapidly expanded  
257 (Glutathione S-transferases: EOG85TG3K, EOG85F05D, EOG8BCH22; UDP-  
258 glycosyltransferase: EOG8BCH22; cuticle proteins: EOG8QJV4S, EOG8DNHJQ; ABC  
259 transporters: EOG83N9TJ), whereas others have contracted (Cytochrome P450s: EOG83N9TJ).  
260 Finally, gene families associated with immune defense (fibrinogen: EOG8DNHJQ;  
261 Immunoglobulin: EOG8Q87B6, EOG8S7N55, EOG854CDX, EOG8KSRZK, EOG8CNT5M)  
262 exhibit expansions that may be linked to defense against pathogens and parasitoids that  
263 commonly attack exposed herbivores [61]. A substantial proportion of the rapidly evolving gene  
264 families include proteins with transposable element domains (25.3%), while other important  
265 functional groups include DNA and protein binding (including many transcription factors),  
266 nuclease activity, protein processing, and cellular transport.

267         Diversification of transcription factor (TF) families potentially signals greater complexity  
268 of gene regulation, including enhanced cell specificity and refined spatiotemporal signaling [62].  
269 Notably, several TF families are substantially expanded in *L. decemlineata*, including HTH\_psq  
270 (194 genes vs. a mean of only 24 across the insects shown in **Figure 2**), MADF (152 vs. 54), and

271 THAP (65 vs. 41). Two of these TF families, HTH\_psq and THAP, are DNA binding domains in  
272 transposons. Of the 1,237 *L. decemlineata* TFs, we could infer DNA binding motifs for 189  
273 (15%) (**Supplementary Table 4S**), mostly based on DNA binding specificity data from  
274 *Drosophila melanogaster* (124 TFs), but also from species as distant as human (45 TFs) and  
275 mouse (11 TFs). Motifs were inferred for a substantial proportion of the TFs in the largest TF  
276 families, including Homeodomain (59 of 90, 66%), bHLH (34 of 46, 74%), and Forkhead box  
277 (14 of 16, 88%). We could only infer a small number of C2H2 zinc finger motifs (21 of 439,  
278 ~5%), which is expected as these sequences evolve quickly by shuffling zinc finger arrays,  
279 resulting in largely dissimilar DNA-binding domains across metazoans [63]. Collectively, the  
280 almost 200 inferred DNA binding motifs for *L. decemlineata* TFs provide a unique resource to  
281 begin unraveling gene regulatory networks in this organism.

282 To identify genes active in mid-gut tissues, life-stages, and sex differences, we examined  
283 differential transcript expression levels using RNA sequencing data. Comparison of significantly  
284 differentially expressed genes with >100-fold change, after Bonferroni correction, indicated  
285 higher expression of digestive enzymes (proteases, peptidases, dehydrogenases and transporters)  
286 in mid-gut versus whole larval tissues, while cuticular proteins were largely expressed at lower  
287 levels (**Figure 3A, Supplementary Table 5S**). Comparison of an adult male and female showed  
288 higher expression of testes and sperm related genes in males, while genes involved in egg  
289 production and sterol biosynthesis are more highly expressed in females (**Figure 3B,**  
290 **Supplementary Table 6S**). Comparisons of larvae to both an adult male (**Figure 3C,**  
291 **Supplementary Table 7S**) and an adult female (**Figure 3D, Supplementary Table 8S**) showed  
292 higher expression of larval-specific cuticle proteins, and lower expression of odorant binding and  
293 chemosensory proteins. The adults, both drawn from a pesticide resistant population, showed

294 higher constitutive expression of cytochrome p450 genes compared to the larval population,  
295 which is consistent with the results from previous studies of neonicotinoid resistance in this  
296 population [48].

## 297 **Transposable Elements**

298 Transposable elements (TEs) are ubiquitous mobile elements within most eukaryotic  
299 genomes and play critical roles in both genome architecture and the generation of genetic  
300 variation [64]. Through insertional mutagenesis and recombination, TEs are a major contributor  
301 to the generation of novel mutations (50-80% of all mutation events within the genome of *D.*  
302 *melanogaster*) [65-67], and are increasingly thought to generate much of the genetic diversity  
303 that contributes to rapid evolution [68-70]. In addition to finding that genes with TE domains  
304 comprise 25% of the rapidly evolving gene families within *L. decemlineata*, we found that at  
305 least 17% of the genome consists of TEs (**Supplementary Table 9S**). This is substantially  
306 greater than the 6% found in *T. castaneum* [51], but less than some Lepidoptera (35% in *Bombyx*  
307 *mori* and 25% in *Heliconius melpomene*) [71,72]. LINEs were the largest TE class, comprising  
308 ~10% of the genome, while SINEs were not detected. Curation of the TE models with intact  
309 protein domains resulted in 334 current models of potentially active TEs, meaning that these TEs  
310 are capable of transposition and excision. Within the group of active TEs, we found 191 LINEs,  
311 99 DNA elements, 38 LTRs, and 5 Helitrons. Given that TEs have been associated with the  
312 ability of species to rapidly adapt to novel selection pressures [73-75], particularly via alterations  
313 of gene expression patterns in neighboring genomic regions, we scanned gene rich regions (1 kb  
314 neighborhood size) for active TE elements. Genes with active neighboring TEs have functions  
315 that include transport, protein digestion, diapause, and metabolic detoxification (**Supplementary**  
316 **Table 10S**). Because TE elements have been implicated in conferring insecticide resistance in

317 other insects [76], future work should investigate the role of these TE insertions on rapid  
318 evolutionary changes within pest populations of *L. decemlineata*.

319

## 320 **Population Genetic Variation and Invasion History**

321 To understand the propensity for *L. decemlineata* pest populations to rapidly evolve  
322 across a range of environmental conditions, we examined geographical patterns of genomic  
323 variability and the evolutionary history of *L. decemlineata* (to see the genomic analysis of  
324 environmental adaptation, refer to the Diapause and Environmental Stress section of  
325 **Supplementary File**). High levels of standing variation are one mechanism for rapid  
326 evolutionary change [77]. We identified 1.34 million biallelic single nucleotide polymorphisms  
327 (SNPs) from pooled RNAseq datasets, or roughly 1 variable site for every 22 base pairs of  
328 coding DNA. This rate of polymorphism is exceptionally high when compared to vertebrates  
329 (e.g. ~1 per kb in humans, or ~1 per 500 bp in chickens) [78,79], and is 8-fold higher than other  
330 beetles (1 in 168 for *D. ponderosae* and 1 in 176 bp for *O. taurus*) [52,80] and 2 to 5-fold higher  
331 than some dipterans (1 in 54 bp for *D. melanogaster* and 1 in 125 bp for *Anopheles gambiae*)  
332 [78,81]. It is likely that these values simply scale with effective population size, although the  
333 dipterans, with the largest known population sizes, have reduced variation due to widespread  
334 selective sweeps and genetic bottlenecks [82].

335 Evolutionary relationships and the amount of genetic drift among Midwestern USA,  
336 Northeastern USA, and European *L. decemlineata* populations were estimated based on genome-  
337 wide allele frequency differences using a population graph. A substantial amount of local genetic  
338 structure and high genetic drift is evident among all populations, although both the reference lab  
339 strain from New Jersey and European populations appear to have undergone more substantial

340 drift, suggestive of strong inbreeding (**Figure 4**). Population genetic divergence ( $F_{ST}$ ) values  
341 (**Supplementary Table 11S**) range from 0.035 (among Wisconsin populations) to 0.182  
342 (Wisconsin compared to Europe). The allele frequency spectrum was calculated for populations  
343 in Wisconsin, Michigan, and Europe to estimate the population genetic parameter  $\theta$ , or the  
344 product of the mutation rate and the ancestral effective population size, and the ratio of  
345 contemporary to ancestral population size in models that allowed for single or multiple episodes  
346 of population size change. Estimates of ancestral  $\theta$  are much higher for Wisconsin ( $\theta = 12595$ )  
347 and Michigan ( $\theta = 93956$ ) than Europe ( $\theta = 3.07$ ; **Supplementary Table 12S**), providing  
348 support for a single introduction into Europe following a large genetic bottleneck [15]. In all  
349 three populations, a model of population size growth is supported, in agreement with historical  
350 accounts of the beetles expanding from the Great Plains into the Midwestern U.S. and Europe  
351 [3,15], but the dynamics of each population appear independent, with the population from  
352 Michigan apparently undergoing a very recent decline in contemporary population size (the ratio  
353 of contemporary to ancient population size is 0.066, compared to 3.3 and 2.1 in Wisconsin and Europe,  
354 respectively).

355

### 356 **Sensory Ecology and Host Plant Detection**

357 To interact with their environment, insects have evolved neurosensory organs to detect  
358 environmental signals, including tactile, auditory, chemical and visual cues [83]. We examined  
359 neural receptors, olfactory genes, and light sensory (opsin) genes to understand the sensory  
360 ecology and host-plant specializations of *L. decemlineata*.

361 We found high sequence similarity in the neuroreceptors of *L. decemlineata* compared to  
362 other Coleoptera. The transient receptor potential (TRP) channels are permeable transmembrane  
363 proteins that respond to temperature, touch, pain, osmolarity, pheromones, taste, hearing, smell

364 and visual cues of insects [84,85]. In most insect genomes, there are typically 13-14 TRP genes  
365 located in insect stretch receptor cells and several are targeted by commercial insecticides [86].  
366 We found 12 TRP genes present in the *L. decemlineata* genome, including the two TRPs  
367 (Nanchung and Inactive) that are targeted by commercial insecticides, representing a complete  
368 set of one-to-one orthologs with *T. castaneum*. Similarly, the 20 known amine neurotransmitter  
369 receptors in *T. castaneum* are present as one-to-one orthologs in *L. decemlineata* [87,88]. Amine  
370 receptors are G-protein-coupled receptors that interact with biogenic amines, such as  
371 octopamine, dopamine and serotonin. These neuroactive substances regulate behavioral and  
372 physiological traits in animals by acting as neurotransmitters, neuromodulators and  
373 neurohormones in the central and peripheral nervous systems [89].

374         The majority of phytophagous insects are restricted to feeding on several plant species  
375 within a genus, or at least restricted to a particular plant family [90]. Thus, to find their host  
376 plants within heterogeneous landscapes, insect herbivores detect volatile organic compounds  
377 through olfaction, which utilizes several families of chemosensory gene families, such as the  
378 odorant binding proteins (OBPs), odorant receptors (ORs), gustatory receptors (GRs), and  
379 ionotropic receptors (IRs) [91]. OBPs directly bind with volatile organic compounds emitted  
380 from host plants and transport the ligands across the sensillar lymph to activate the membrane-  
381 bound ORs in the dendrites of the olfactory sensory neurons [92]. The ORs and GRs are 7-  
382 transmembrane proteins related within a superfamily [93] of ligand-gated ion channels [94]. The  
383 ionotropic receptors are related to ionotropic glutamate receptors and function in both smell and  
384 taste [95]. These four gene families are commonly large in insect genomes, consisting of tens to  
385 hundreds of members.



386 We compared the number of genes found in *L. decemlineata* in the four chemosensory  
387 gene families to *T. castaneum* and *A. glabripennis* (**Table 2**, as well as **Supplementary Tables**  
388 **13S-16S** for details). While the OBP family is slightly enlarged, the three receptor families are  
389 considerably smaller in *L. decemlineata* than in either *A. glabripennis* or *T. castaneum*,  
390 consistent with the specialization of this beetle on one genus of plants. However, each beetle  
391 species exhibits species-specific gene subfamily expansions (**Supplementary Figures 5S-8S**); in  
392 particular, some lineages of GRs related to bitter taste are expanded in *L. decemlineata* relative  
393 to *A. glabripennis* and other beetles. Among the OBPs, we identified a major *L. decemlineata*-  
394 specific expansion of proteins belonging to the Minus-C class (OBPs that have lost two of their  
395 six conserved cysteine residues) that appear unrelated to the ‘traditional’ Minus-C subfamily in  
396 Coleoptera, indicating that coleopteran OBPs have lost cysteines on at least two occasions.

397 To understand the visual acuity of *L. decemlineata*, we examined the G-protein-coupled  
398 transmembrane receptor opsin gene family. We found five opsins, three of which are members of  
399 rhabdomeric opsin (R-opsin) subfamilies expressed in the retina of insects [51,96]. Specifically,  
400 the *L. decemlineata* genome contains one member of the long wavelength-sensitive R-opsin and  
401 two short wavelength UV-sensitive R-opsins. The latter were found to be closely linked in a  
402 range of less than 20,000 bp, suggestive of recent tandem gene duplication. Overall, the  
403 recovered repertoire of retinally-expressed opsins in *L. decemlineata* [97] is consistent with the  
404 beetle’s attraction to yellow light and to the yellow flowers of its ancestral host plant, *S.*  
405 *rostratum* [98,99], and is consistent with the beetle’s sensitivity in the UV- and LW-range [100].  
406 In addition, we found a member of the Rh7 R-opsin subfamily, which is broadly conserved in  
407 insects including other beetle species (*A. glabripennis*), although it is missing from *T.*

408 *castaneum*. Finally, *L. decemlineata* has a single ortholog of the c-opsin subfamily shared with *T.*  
409 *castaneum*, which is absent in *A. glabripennis* and has an unclear role in photoreception [101].

410

## 411 **Host Plant Utilization**

### 412 *Protein digestion*

413 Insect herbivores are fundamentally limited by nitrogen availability [102], and thus need  
414 to efficiently break down plant proteins in order to survive and develop on host plants [103].

415 *Leptinotarsa decemlineata* has serine and cysteine digestive peptidases (coined “intestains”)  
416 [32,104,105], as well as aspartic and metallo peptidases [33], for protein digestion. For the vast  
417 majority of plant-eating beetles (the infraorder Cucujiformia, which includes Chrysomelidae),  
418 cysteine peptidases contribute most strongly to proteolytic activity in the gut [105,106]. In  
419 response to herbivory, plants produce a wide range of proteinase inhibitors to prevent insect  
420 herbivores from digesting plant proteins [103,105,107]. Coleopteran peptidases are differentially  
421 susceptible to plant peptidase inhibitors, and our annotation results suggest that gene duplication  
422 and selection for inhibitor insensitive genotypes may have contributed to the success of leaf-  
423 feeding beetles (Chrysomelidae) on different plants. We found that gene expansion of cysteine  
424 cathepsins from the C1 family in *L. decemlineata* correlates with the acquisition of greater  
425 digestive function by this group of peptidases, which is supported by gene expression activity of  
426 these genes in mid-gut tissue (**Figure 3A, Figure 5**). The gene expansion may be explained by  
427 an evolutionary arms race between insects and plants that favors insects with a variety of  
428 digestive peptidases in order to resist plant peptidase inhibitors [108,109] and allows for  
429 functional specialization [110].

430 Cysteine peptidases of the C1 family were represented by more than 50 genes separated  
431 into four groups with different structure and functional characteristics (**Supplementary Table**  
432 **18S**): cathepsin L subfamily, cathepsin B subfamily, TINAL-like genes, and cysteine peptidase  
433 inhibitor domains (CPIDs). Cathepsin L subfamily cysteine peptidases are endopeptidases [111]  
434 that can be distinguished by the cathepsin propeptide inhibitor domain I29 (pfam08246)  
435 [112,113]. Within the cathepsin L subfamily, we found sequences that were similar to classical  
436 cathepsin L, cathepsin F, and cathepsin O. However, there were 28 additional predicted  
437 peptidases of this subfamily that could not be assigned to any of the “classical” cathepsin types,  
438 and most of these were grouped into two gene expansions (uL1 and uL2) according to their  
439 phylogenetic and structural characteristics. Cathepsin B subfamily cysteine peptidases are  
440 distinguished by the specific peptidase family C1 propeptide domain (pfam08127). Within the  
441 cathepsin B subfamily, there was one gene corresponding to typical cathepsin B peptidases and  
442 14 cathepsin B-like genes. According to the structure of the occluding loop, only the typical  
443 cathepsin B may have typical endo- and exopeptidase activities, while a large proportion of  
444 cathepsin B-like peptidases presumably possesses only endopeptidase activity due to the absence  
445 of a His-His active subsite in the occluding loop, which is responsible for exopeptidase activity  
446 [111]. Only one gene corresponding to a TINAL-like-protein was present, which has a domain  
447 similar to cathepsin B in the C-terminus, but lacks peptidase activity due to the replacement of  
448 the active site Cys residue with Ser [114]. Cysteine peptidase inhibitor domain (CPID) genes  
449 encode the I29 domain of cysteine peptidases without the mature peptidase domain. Within the  
450 CPID group, there were seven short inhibitor genes that lack the enzymatic portion of the  
451 protein. A similar trend of “stand-alone inhibitors” has been observed in other insects, such as *B.*  
452 *mori* [115]. These CPID genes may be involved in the regulation of cysteine peptidases. We note

453 that we found multiple fragments of cysteine peptidase genes, suggesting that the current list of  
454 *L. decemlineata* genes may be incomplete. Comparison of these findings with previous data on  
455 *L. decemlineata* cysteine peptidases [116] demonstrates that intestains correspond to several  
456 peptidase genes from the uL1 and uL2 groups (**Supplementary Table 18S**). These data, as well  
457 as literature for Tenebrionidae beetles [117], suggest that intensive gene expansion is typical for  
458 peptidases that are involved in digestion.

459 We also found a high number of digestion-related serine peptidase genes in the *L.*  
460 *decemlineata* genome (**Supplementary Table 19S**), but they contribute only a small proportion  
461 of the beetle's total gut proteolytic activity [32]. Of the 31 identified serine peptidase genes and  
462 fragments, we annotated 16 as trypsin-like peptidases and 15 as chymotrypsin-like peptidases.  
463 For four chymotrypsin-like and one trypsin-like peptidase, we identified only short fragments.  
464 All complete (and near-complete) sequences have distinctive S1A peptidase subfamily motifs, a  
465 conserved catalytic triad, conserved sequence residues such as the "CWC" sequence and  
466 cysteines that form disulfide bonds in the chymotrypsin protease fold. The number of serine  
467 peptidases was higher than expected based upon the number of previously identified EST clones  
468 [32], but lower than the number of chymotrypsin and trypsin genes in the *T. castaneum* genome.  
469

#### 470 *Carbohydrate digestion*

471 Carbohydrates are the other category of essential nutrients for *L. decemlineata*. The  
472 enzymes that assemble and degrade oligo- and polysaccharides, collectively termed  
473 Carbohydrate active enzymes (CAZy), are categorized into five major classes: glycoside  
474 hydrolases (GH), polysaccharide lyases, carbohydrate esterases (CE), glycosyltransferases (GT)  
475 and various auxiliary oxidative enzymes [118]. Due to the many different roles of carbohydrates,

476 the CAZy family profile of an organism can provide insight into “glycobiological potential” and,  
477 in particular, mechanisms of carbon acquisition [119]. We identified 182 GHs assigned to 25  
478 families, 181 GTs assigned to 41 families, and two CEs assigned to two families in *L.*  
479 *decemlineata*; additionally, 99 carbohydrate-binding modules (which are non-catalytic modules  
480 associated with the above enzyme classes) were present and assigned to 9 families  
481 (**Supplementary Table 20S**; the list of CAZy genes is presented in **Supplementary Table 21S**).  
482 We found that *L. decemlineata* has three families of genes associated with plant cell wall  
483 carbohydrate digestion (GH28, GH45 and GH48) that commonly contain enzymes that target  
484 pectin (GH28) and cellulose (GH45 and GH48), the major structural components of leaves [120].  
485 We found evidence of massive gene duplications in the GH28 family (14 genes) and GH45  
486 family (11 genes, plus one additional splicing variant), whereas GH48 is represented by only  
487 three genes in the genome [121]. Overall, the genome of *L. decemlineata* shows a CAZy profile  
488 adapted to metabolize pectin and cellulose contained in leaf cell walls. The absence of specific  
489 members of the families GH43 ( $\alpha$ -L-arabinofuranosidases) and GH78 ( $\alpha$ -L-rhamnosidases)  
490 suggests that *L. decemlineata* can break down homogalacturonan, but not substituted  
491 galacturonans such as rhamnogalacturonan I or II [120]. The acquisition of these plant cell wall  
492 degrading enzymes has been linked to horizontal transfer in the leaf beetles and other  
493 phytophagous beetles [120], with strong phylogenetic evidence supporting the transfer of GH28  
494 genes from a fungal donor (Pezizomycotina) in *L. decemlineata*, as well as in the beetles *D.*  
495 *ponderosae* and *Hypothenemus hampei*, but a novel fungal donor in the more closely related  
496 cerambycid beetle *A. glabripennis* [54] and a bacterial donor in the weevil *Callosobruchus*  
497 *maculatus* [120].  
498

## 499 **Insecticide Resistance**

500 To understand the functional genomic properties of insecticide resistance, we examined  
501 genes important to neuromuscular target site sensitivity, tissue penetration, and prominent gene  
502 families involved in Phase I, II, and III metabolic detoxification of xenobiotics [122]. These  
503 include the cation-gated nicotinic acetylcholine receptors (nAChRs), the  $\gamma$ -amino butyric acid  
504 (GABA)-gated anion channels and the histamine-gated chloride channels (HisCl<sub>s</sub>), cuticular  
505 proteins, cytochrome P450 monooxygenases (CYPs), and the Glutathione S-transferases (GSTs).

506 Many of the major classes of insecticides (organochlorides, organophosphates,  
507 carbamates, pyrethroids, neonicotinoids and ryanoids) disrupt the nervous system (particularly  
508 ion channel signaling), causing paralysis and death [123]. Resistance to insecticides can come  
509 from point mutations that reduce the affinity of insecticidal toxins to ligand-gated ion  
510 superfamily genes [124]. The cys-loop ligand-gated ion channel gene superfamily is comprised  
511 of receptors involved in mediating synaptic ion flow during neurotransmission [125]. A total of  
512 22 cys-loop ligand-gated ion channels were identified in the *L. decemlineata* genome in numbers  
513 similar to those observed in other insects [126], including 12 nAChRs, three GABA receptors,  
514 and two HisCl<sub>s</sub> (**Supplementary Figure 9S**). The GABA-gated chloride channel homolog of the  
515 *Resistance to dieldrin (Rdl)* gene of *D. melanogaster* was examined due to its role in resistance  
516 to dieldrin and other cyclodienes in Diptera [127]. The coding sequence is organized into 10  
517 exons (compared to nine in *D. melanogaster*) on a single scaffold, with duplications of the third  
518 and sixth exon (**Supplementary Figure 10S**). Alternative splicing of these two exons encodes  
519 for four different polypeptides in *D. melanogaster* [128,129], and as the splice junctions are  
520 present in *L. decemlineata*, we expect the same diversity of *Rdl*. The point mutations in the

521 transmembrane regions TM2 and TM3 of *Rdl* are known to cause insecticide resistance in  
522 Diptera [124,127], but were not observed in *L. decemlineata*.

523 Cuticle genes have been implicated in imidacloprid resistant *L. decemlineata* [130] and at  
524 least one has been shown to have phenotypic effects on resistance traits following RNAi  
525 knockdown [131]. A total of 163 putative cuticle protein genes were identified and assigned to  
526 one of seven families (CPR, CPAP1, CPAP3, CPF, CPCFC, CPLCG, and TWDL)  
527 (**Supplemental Figure 11S** and **Table 22S**). Similar to other insects, the CPR family, with the  
528 RR-1 (soft cuticle), RR-2 (hard cuticle), and unclassifiable types, constituted the largest group of  
529 cuticle protein genes (132) in the *L. decemlineata* genome. While the number of genes in *L.*  
530 *decemlineata* is slightly higher than in *T. castaneum* (110), it is similar to *D. melanogaster* (137)  
531 [132]. Numbers in the CPAP1, CPAP3, CPF, and TWDL families were similar to other insects,  
532 and notably no genes with the conserved sequences for CPLCA were detected in *L.*  
533 *decemlineata*, although they are found in other Coleoptera.

534 A total of 89 CYP (P450) genes were identified in the *L. decemlineata* genome, an  
535 overall decrease relative to *T. castaneum* (143 genes). Due to their role in insecticide resistance  
536 in *L. decemlineata* and other insects [38,48,133], we examined the CYP6 and CYP12 families in  
537 particular. Relative to *T. castaneum*, we observed reductions in the CYP6BQ, CYP4BN, and  
538 CYP4Q subfamilies. However, five new subfamilies (CYP6BJ, CYP6BU, CYP6E, CYP6F and  
539 CYP6K) were identified in *L. decemlineata* that were absent in *T. castaneum*, and the CYP12  
540 family contains three genes as opposed to one gene in *T. castaneum* (CYP12h1). We found  
541 several additional CYP genes not present in *T. castaneum*, including CYP413A1, CYP421A1,  
542 CYP4V2, CYP12J and CYP12J4. Genes in CYP4, CYP6, and CYP9 are known to be involved  
543 in detoxification of plant allelochemicals as well as resistance to pesticides through their

544 constitutive overexpression and/or inducible expression in imidacloprid resistant *L. decemlineata*  
545 [48,130].

546 GSTs have been implicated in resistance to organophosphate, organochlorine and  
547 pyrethroid insecticides [134] and are responsive to insecticide treatments in *L. decemlineata*  
548 [130,135]. A total of 27 GSTs were present in the *L. decemlineata* genome, and while they  
549 represent an expansion relative to *A. glabripennis*, all have corresponding homologs in *T.*  
550 *castaneum*. The cytosolic GSTs include the epsilon (11 genes), delta (5 genes), omega (4 genes),  
551 theta (2 genes) and sigma (3 genes) families, while two GSTs are microsomal (**Supplementary**  
552 **Figure 12S**). Several GST-like genes present in the *L. decemlineata* genome represent the Z  
553 class previously identified using transcriptome data [135].

554

### 555 **Pest Control via the RNAi Pathway**

556 RNA interference (RNAi) is the process by which small non-coding RNAs trigger  
557 sequence-specific gene silencing [136], and is important in protecting against viruses and mobile  
558 genetic elements, as well as regulating gene expression during cellular development [137]. The  
559 application of exogenous double stranded RNA (dsRNA) has been exploited as a tool to suppress  
560 gene expression for functional genetic studies [138,139] and for pest control [41,140].

561 We annotated a total of 49 genes associated with RNA interference, most of them were  
562 found on a single scaffold. All genes from the core RNAi machinery (from all three major RNAi  
563 classes) were present in *L. decemlineata*, including fifteen genes encoding components of the  
564 RNA Induced Silencing Complex (RISC) and genes known to be involved in double-stranded  
565 RNA uptake, transport, and degradation (**Supplementary Table 22S**). A complete gene model  
566 was annotated for *R2D2*, an essential component of the siRNA pathway that interacts with *dicer*-



567 2 to load siRNAs into the RISC, and not previously detected in the transcriptome of the *L.*  
568 *decemlineata* mid-gut [141]. The core components of the small interfering RNA (siRNA)  
569 pathway were duplicated, including *dicer-2*, an RNase III enzyme that cleaves dsRNAs and pre-  
570 miRNAs into siRNAs and miRNAs respectively [142,143]. The *dicer-2a* and *dicer-2b* CDS have  
571 60% nucleotide identity to each other, and 56% and 54% identity to the *T. castaneum dicer-2*  
572 homolog, respectively. The *argonaute-2* gene, which plays a key role in RISC by binding small  
573 non-coding RNAs, was also duplicated. A detailed analysis of these genes will be necessary to  
574 determine if the duplications provide functional redundancy. The duplication of genes in the  
575 siRNA pathway may play a role in the high sensitivity of *L. decemlineata* to RNAi knockdown  
576 [144] and could benefit future efforts to develop RNAi as a pest management technology.

577

## 578 **Conclusion**

579 The whole-genome sequence of *L. decemlineata*, provides novel insights into one of the  
580 most diverse animal taxa, Chrysomelidae. It is amongst the largest beetle genomes sequenced to  
581 date, with a minimum assembly size of 640 Mb (ranging up to 1.17 Gb) and 24,740 genes. The  
582 genome size is driven in part by a large number of transposable element families, which  
583 comprise at least 17% of the genome and appear to be rapidly expanding relative to other beetles.  
584 Population genetic analyses suggest high levels of nucleotide diversity, local geographic  
585 structure, and evidence of recent population growth, which helps to explain how *L. decemlineata*  
586 rapidly evolves to exploit novel host plants, climate space, and overcome a range of pest  
587 management practices (including a large and diverse number of insecticides). Digestive  
588 enzymes, in particular the cysteine peptidases and carbohydrate-active enzymes, show evidence  
589 of gene expansion and elevated expression in gut tissues, suggesting the diversity of the genes is

590 a key trait in the beetle's phytophagous lifestyle. Additionally, expansions of the gustatory  
591 receptor subfamily for bitter tasting might be a key adaptation to exploiting hosts in the  
592 nightshade family, Solanaceae, while expansions of novel subfamilies of CYP and GST proteins  
593 are consistent with rapid, lineage-specific turnover of genes implicated in *L. decemlineata*'s  
594 capacity for insecticide resistance. Finally, *L. decemlineata* has interesting duplications in RNAi  
595 genes that might increase its sensitivity to RNAi and provide a promising new avenue for  
596 pesticide development. The *L. decemlineata* genome promises new opportunities to investigate  
597 the ecology, evolution, and management of this species, and to leverage genomic technologies in  
598 developing sustainable methods of pest control.

599

## 600 **Materials and Methods**

### 601 *Genome Characteristics and Sampling of DNA and RNA*

602 Previous cytological work determined that *L. decemlineata* is diploid and consists of 34  
603 autosomes plus an XO system in males, or an XX system in females [145]. Twelve  
604 chromosomes are submetacentric, while three are acrocentric and two are metacentric, although  
605 one chromosome is heteromorphic (acrocentric and/or metacentric) in pest populations [146].  
606 The genome size has been estimated with Feulgen densitometry at 0.46 pg, or approximately 460  
607 Mb [47]. To generate a reference genome sequence, DNA was obtained from a single adult  
608 female, sampled from an imidacloprid resistant strain developed from insects collected from a  
609 potato field in Long Island, NY. Additionally, whole-body RNA was extracted for one male and  
610 one female from the same imidacloprid resistant strain. Raw RNAseq reads for 8 different  
611 populations were obtained from previous experiments: two Wisconsin populations  
612 (PRJNA297027) [130], a Michigan population (PRJNA400685), a lab strain originating from a

613 New Jersey field population (PRJNA275431), and three samples from European populations  
614 (PRJNA79581 and PRJNA236637) [43,121]. All RNAseq data came from pooled populations or  
615 were combined into a population sample from individual reads. In addition, RNA samples of an  
616 adult male and female from the same New Jersey population were sequenced separately using  
617 Illumina HiSeq 2000 as 100 bp paired end reads (deposited in the GenBank/EMBL/DDBJ  
618 database, PRJNA275662), and three samples from the mid-gut of 4<sup>th</sup>-instar larvae were  
619 sequenced using SOLiD 5500 Genetic Analyzer as 50 bp single end reads (PRJNA400633).

620

### 621 ***Genome Sequencing, Assembly, Annotation and Assessment***

622 Four Illumina sequencing libraries were prepared, with insert sizes of 180 bp, 500 bp, 3  
623 kb, and 8 kb, and sequenced with 100 bp paired-end reads on the Illumina HiSeq 2000 platform  
624 at estimated 40x coverage, except for the 8kb library, which was sequenced at estimated 20x  
625 coverage. ALLPATHS-LG v35218 [49] was used to assemble reads. Two approaches were used  
626 to scaffold contigs and close gaps in the genome assembly. The reference genome used in  
627 downstream analyses was generated with ATLAS-LINK v1.0 and ATLAS GAP-FILL v2.2  
628 (<https://www.hgsc.bcm.edu/software/>). In the second approach, REDUNDANS was used [57], as  
629 it is optimized to deal with heterozygous samples. The raw sequence data and *L. decemlineata*  
630 genome have been deposited in the GenBank/EMBL/DDBJ database (Bioproject accession  
631 PRJNA171749, Genome assembly GCA\_000500325.1, Sequence Read Archive accessions:  
632 SRX396450- SRX396453). This data can be visualized, along with gene models and supporting  
633 data, at the i5k Workspace@NAL: [https://i5k.nal.usda.gov/Leptinotarsa\\_decemlineata](https://i5k.nal.usda.gov/Leptinotarsa_decemlineata) and  
634 <https://apollo.nal.usda.gov/lepdec/jbrowse/> [147]. We estimated the size of our genome using a

635 kmer distribution plot in JELLYFISH [148], where we mapped the 100 bp paired-end reads from  
636 the 180 bp insert library, used a 19 bp kmer distribution plot, and corrected for ploidy.

637 Automated gene prediction and annotation were performed using MAKER v2.0 [149],  
638 using RNAseq evidence and arthropod protein databases. The MAKER predictions formed the  
639 basis of the first official gene set (OGS v0.5.3). To improve the structural and functional  
640 annotation of genes, these gene predictions were manually and collaboratively edited using the  
641 interactive curation software Apollo [150]. For a given gene family, known insect genes were  
642 obtained from model species, especially *T. castaneum* [51] and *D. melanogaster* [151], and the  
643 nucleotide or amino acid sequences were used in *blastx* or *tblastn* [152,153] to search the *L.*  
644 *decemlineata* OGS v0.5.3 or genome assembly, respectively, on the i5k Workspace@NAL. All  
645 available evidence (AUGUSTUS, SNAP, RNA data, etc.), including additional RNAseq data not  
646 used in the MAKER predictions, were used to inspect and modify gene predictions. Changes  
647 were tracked to ensure quality control. Gene models were inspected for quality, incorrect splits  
648 and merges, internal stop codons, and gff3 formatting errors, and finally merged with the  
649 MAKER-predicted gene set to produce the official gene set (OGS v1.0; merging scripts are  
650 available upon request). For focal gene families (e.g. peptidase genes, odorant and gustatory  
651 receptors, RNAi genes, etc.), details on how genes were identified and assigned names based on  
652 functional predictions or evolutionary relationship to known reference genes are provided in the  
653 Supplementary Material (**Supplementary File**).

654 To assess the quality of our genome assemblies, we used BUSCO v2.0 [59] to determine  
655 the completeness of each genome assembly and the official gene set (OGS v1.0), separately. We  
656 benchmarked our data against 35 insect species in the Endopterygota obd9 database, which  
657 consists of 2,442 single-copy orthologs (BUSCOs). Secondly, we annotated and examined the

658 genomic architecture of the Hox and Iroquois Complex gene clusters. For this, tBLASTn  
659 searches were performed against the genome using orthologous Hox gene protein sequences  
660 from *T. castaneum* (Tcas3.0) and *A. glabripennis*. Provisional *L. decemlineata* models were  
661 refined, and potential gene duplications were identified, via iterative and reciprocal BLAST and  
662 by manual inspection and correction of protein alignments generated with ClustalW2 [154],  
663 using RNAseq expression evidence when available. Finally, we used BlobTools v1.0 [155] to  
664 assess the assembled genome for possible contamination by generating a Blobplot. This plot  
665 integrates guanine and cytosine (GC) content of sequences, read coverage and sequence  
666 similarity via blast searches to assess genome contamination. Putative contaminants were  
667 identified using DIAMOND BLAST [156] to query the genome scaffolds against the UniProt  
668 reference database [157], and read coverage was assessed by mapping the 100 bp paired-end  
669 reads from the 180 bp insert library to the ALLPATHS genome with the Burrows-Wheeler  
670 Aligner (bwa-mem) version 0.7.5a [158].

671

## 672 ***Gene Family Evolution***

673 In order to identify rapidly evolving gene families along the *L. decemlineata* lineage, we  
674 obtained ~38,000 ortho-groups from 72 Arthropod species as part of the i5k pilot project  
675 (Thomas et al. *in prep*) from OrthoDB version 8 [159]. For each ortho-group, we took only those  
676 genes present in the order Coleoptera, which was represented by the following six species: *A.*  
677 *glabripennis*, *A. planipennis*, *D. ponderosae*, *L. decemlineata*, *O. taurus*, and *T. castaneum*  
678 (<http://i5k.github.io/>) [51,52,54]. Finally, in order to make accurate inferences of ancestral  
679 states, families that were present in only one of the six species were removed. This resulted in a  
680 final count of 11,598 gene families that, among these six species, form the comparative

681 framework that allowed us to examine rapidly evolving gene families in the *L. decemlineata*  
682 lineage.

683         Aside from the gene family count data, an ultrametric phylogeny is also required to  
684 estimate gene gain and loss rates. To make the tree, we considered only gene families that were  
685 single copy in all six species and that had another arthropod species also represented with a  
686 single copy as an outgroup. Outgroup species were ranked based on the number of families in  
687 which they were also single copy along with the coleopteran species, and the highest ranking  
688 outgroup available was chosen for each family. For instance, *Pediculus humanus* was the most  
689 common outgroup species. For any gene family, we chose *P. humanus* as the outgroup if it was  
690 also single copy. If it was not, we chose the next highest ranking species as the outgroup for that  
691 family. This process resulted in 3,932 single copy orthologs that we subsequently aligned with  
692 PASTA [160]. We used RAxML [161] with the PROTGAMMAJTTF model to make gene trees  
693 from the alignments and ASTRAL [162] to make the species tree. ASTRAL does not give  
694 branch lengths on its trees, a necessity for gene family analysis, so the species tree was again  
695 given to RAxML along with a concatenated alignment of all one-to-one orthologs for branch  
696 length estimation. Finally, to generate an ultrametric species tree with branch lengths in millions  
697 of years (my) we used the software r8s [163], with a calibration range based on age estimates of  
698 a crown Coleopteran fossil at 208.5-411 my [164]. This calibration point itself was estimated in a  
699 similar fashion in a larger phylogenetic analysis of all 72 Arthropod species (Thomas et al. *in*  
700 *prep*).

701         With the gene family data and ultrametric phylogeny as the input data, gene gain and loss  
702 rates ( $\lambda$ ) were estimated with CAFE v3.0 [165]. CAFE is able to estimate the amount of  
703 assembly and annotation error ( $\varepsilon$ ) present in the input data using a distribution across the

704 observed gene family counts and a pseudo-likelihood search, and then is able to correct for this  
705 error and obtain a more accurate estimate of  $\lambda$ . Our analysis had an  $\varepsilon$  value of about 0.02, which  
706 implies that 3% of gene families have observed counts that are not equal to their true counts.  
707 After correcting for this error rate,  $\lambda = 0.0010$  is on par with those previously those found for  
708 other Arthropod orders (Thomas et al. *in prep*). Using the estimated  $\lambda$  value, CAFE infers  
709 ancestral gene counts and calculates p-values across the tree for each family to assess the  
710 significance of any gene family changes along a given branch. Those branches with low p-values  
711 are considered rapidly evolving.

712

### 713 ***Gene Expression Analysis***

714 RNAseq analyses were conducted to 1) establish male, female, and larva-enriched gene  
715 sets and 2) identify specific genes that are enriched within the digestive tract (mid-gut) compared  
716 to entire larva. RNAseq datasets were trimmed with CLC Genomics v.9 (Qiagen) and quality  
717 was assessed with FastQC (<http://www.bioinformatics.babraham.ac.uk/projects/fastqc>). Each  
718 dataset was mapped to the predicted gene set (OGS v1.0) using CLC Genomics. Reads were  
719 mapped with >90% similarity over 60% of length, with two mismatches allowed. The number of  
720 reads were corrected to reads per million mapped to allow comparison between RNAseq datasets  
721 that having varying coverage. Transcripts per million (TPM) was used as a proxy for gene  
722 expression and fold changes were determined as the TPM in one sample relative to the TPM of  
723 another dataset [166]. The Baggerly's test (t-type test statistic) followed by Bonferroni correction  
724 was used to identify genes with significant enrichment in a specific sample [167]. Statistical  
725 values for Bonferroni correction were reported as the number of genes x  $\alpha$  value. This stringent  
726 statistical analysis was used as only a single replicate was available for each treatment. Enriched

727 genes were removed, and mapping and expression analyses were repeated to ensure low  
728 expressed genes were not missed. Genes were identified by BLASTx searching against the NCBI  
729 non-redundant protein databases for arthropods with an expectation value (E-value) < 0.001.

730

### 731 ***Transposable Elements***

732 We investigated the identities (family membership), diversity, and genomic distribution  
733 of active transposable elements within *L. decemlineata* in order to understand their contribution  
734 to genome structure and to determine their potential positional effect on genes of interest  
735 (focusing on a TE neighborhood size of 1 kb). To identify TEs and analyze their distribution  
736 within the genome, we developed three repeat databases using: 1) RepeatMasker [168], which  
737 uses the library repeats within Repbase (<http://www.girinst.org/rebase/>), 2) the program  
738 RepeatModeler [169], which identifies de-novo repeat elements, and 3) literature searches to  
739 identify beetle transposons that were not found within Repbase. The three databases were used  
740 within RepeatMasker to determine the overall TE content in the genome.

741 To eliminate false positives and examine the genome neighborhood surrounding active  
742 TEs, all TE candidate models were translated in 6 frames and scanned for protein domains from  
743 the Pfam and CDD database (using the software transeq from Emboss, hmmer3 and rps-blast).  
744 The protein domain annotations were manually curated in order to remove: a) clear false  
745 positives, b) old highly degraded copies of TEs without identifiable coding potential, and c) the  
746 correct annotation when improper labels were given. The TE models that contained protein  
747 domains were mapped onto the genome and used for our neighborhood analysis: we extracted  
748 the 1 kb flanking regions for each gene and scanned these regions for TEs with intact protein  
749 coding domains.



750

751 ***Population Genetic Variation and Demographic Analysis***

752       Population genetic diversity of pooled RNAseq samples was used to examine genetic  
753 structure of pest populations and past population demography. For Wisconsin, Michigan and the  
754 lab strains from New Jersey, we aligned the RNAseq data to the genomic scaffolds, using  
755 Bowtie2 version 2.1.0 [170] to index the genome and generate aligned SAM files. We used bwa  
756 [150] to align the RNAseq from the three populations from Europe. SAMtools/BCFtools version  
757 0.1.19 [171] was used to produce BAM and VCF files. All calls were filtered with VCFtools  
758 version 0.1.11 [172] using a minimum quality score of 30 and minimum depth of 10. All indels  
759 were removed from this study. Population specific VCF files were sorted and merged using  
760 VCFtools, and the allele counts were extracted for each SNP. These allele frequency data were  
761 then used to infer population splits and relative rates of genetic drift using Treemix version 1.12  
762 [173]. We ran Treemix with SNPs in groups of 1000, choosing to root the tree with the  
763 Wisconsin population. In addition, for each pair of populations, we estimated the average genetic  
764 divergence by using F-statistics ( $F_{ST}$ ) in VCFtools to calculate the ratio of among- to within-  
765 population genetic divergence across SNP loci.

766       To infer patterns of demographic change in the Midwestern USA (Wisconsin and  
767 Michigan) and European populations, the genome-wide allele frequency spectrum was used in  
768 *dadi* version 1.6.3 [174] to infer demographic parameters under several alternative models of  
769 population history. The history of *L. decemlineata* as a pest is relatively well-documented. The  
770 introduction of *L. decemlineata* into Europe in 1914 [175] is thought to have involved a strong  
771 bottleneck [15] followed by rapid expansion. Similarly, an outbreak of *L. decemlineata* in  
772 Nebraska in 1859 is thought to have preceded population expansion into the Midwest reaching

773 Wisconsin in 1865 [3]. For each population, a constant-size model, a two-epoch model of  
774 instantaneous population size change at a time point  $\tau$ , a bottle-growth model of instantaneous  
775 size change followed by exponential growth, and a three-epoch model with a population size  
776 change of fixed duration followed by exponential growth, was fit to infer  $\theta$ , the product of the  
777 ancestral effective population size and mutation rate, and relative population size changes.  
778

779 **References**

- 780 1. Grafius E. Economic impact of insecticide resistance in the Colorado potato beetle  
781 (Coleoptera: Chrysomelidae) on the Michigan potato industry. *J Econ Entomol.* 1997;90:1144–  
782 51.
- 783 2. Skryabin K. Do Russia and Eastern Europe need GM plants? *Nat Biotechnol.* 2010;27:593–5.
- 784 3. Walsh BD. The new potato bug and its natural history. *Practical Entomol.* 1865;1:1–4.
- 785 4. Gauthier NL, Hofmaster RN, and Semel M. History of Colorado potato beetle control. In:  
786 Lashomb JH and Casagrande R, editors. *Advances in Potato Pest Management*. Stroudsburg:  
787 Hutchinson Ross Publishing Co.; 1981. p. 13–33.
- 788 5. Hare JD. Ecology and management of the Colorado potato beetle. *Annu Rev Entomol.*  
789 1990;41:81–100.
- 790 6. Weber DC. Colorado Potato Beetle, *Leptinotarsa decemlineata* (Say) (Coleoptera:  
791 Chrysomelidae). In: Capinera JL, editor. *Encyclopedia of Entomology*. Dordrecht: Springer  
792 Netherlands; 2008. p. 1008–13.
- 793 7. Lyytinen A, Boman S, Grapputo A, Lindström L, Mappes J. Cold tolerance during larval  
794 development: effects on the thermal distribution limits of *Leptinotarsa decemlineata*. *Entomol*  
795 *Exp Appl.* 2009;133:92–9.
- 796 8. Hiiesaar K, Jõgar K, Williams IH, Kruus E, Metspalu L, Luik A, et al. Factors affecting  
797 development and overwintering of second generation Colorado Potato Beetle (Coleoptera:  
798 Chrysomelidae) in Estonia in 2010. *Acta Agric Scand Sect B - Soil Plant Sci.* 2013;63:506–15.
- 799 9. Hiiesaar K, Jõgar K, Williams IH, Luik A, Kruus E, Metspalu L, et al. Phenology and  
800 overwintering of the Colorado potato beetle *Leptinotarsa decemlineata* Say in 2008–2015 in  
801 Estonia. *Acta Agric Scand Sect. B — Soil Plant Sci.* 2016;1–8.

- 802 10. Alyokhin A, Baker M, Mota-Sanchez D, Dively G, Grafius E. Colorado potato beetle  
803 resistance to insecticides. *Am J Potato Res.* 2008;85:395–413.
- 804 11. Sparks TC, Nauen R. IRAC: Mode of action classification and insecticide resistance  
805 management. *Pestic Biochem Physiol.* 2015;121:122–8.
- 806 12. Izzo V, Chen YH, Schoville SD, Wang C, Hawthorne DJ. Origin of pest lineages of the  
807 Colorado potato beetle, *Leptinotarsa decemlineata*. *bioRxiv.* 2017;doi: 10.1101/156612.
- 808 13. Lehmann P, Lyytinen A, Piironen S, Lindström L. Northward range expansion requires  
809 synchronization of both overwintering behaviour and physiology with photoperiod in the  
810 invasive Colorado potato beetle (*Leptinotarsa decemlineata*). *Oecologia.* 2014;176:57–68.
- 811 14. Liu N, Li Y, Zhang R. Invasion of Colorado potato beetle, *Leptinotarsa decemlineata*, in  
812 China: dispersal, occurrence, and economic impact. *Entomol Exp Appl.* 2012;143:207–17.
- 813 15. Grapputo A, Boman S, Lindström L, Lyytinen A, Mappes J. The voyage of an invasive  
814 species across continents: genetic diversity of North American and European Colorado potato  
815 beetle populations. *Mol Ecol.* 2005;14:4207–19.
- 816 16. Azeredo-Espin A, Schroder R, Huettel M, Sheppard W. Mitochondrial DNA variation in  
817 geographic populations of Colorado potato beetle, *Leptinotarsa decemlineata* (Coleoptera;  
818 Chrysomelidae). *Experientia.* 1991;47:483–5.
- 819 17. Lu W, Kennedy GG, Gould F. Genetic analysis of larval survival and larval growth of two  
820 populations of *Leptinotarsa decemlineata* on tomato. *Entomol. Exp. Appl.* 2001;99:143–55.
- 821 18. Gaston KJ. The how and why of biodiversity. *Nature.* 2003;421:900–1.
- 822 19. Turnock WJ, Fields PG. Winter climates and cold hardiness in terrestrial insects. *Eur J*  
823 *Entomol.* 2005;102:561–576.

- 824 20. Piironen S, Ketola T, Lyytinen A, Lindström L. Energy use, diapause behaviour and  
825 northern range expansion potential in the invasive Colorado potato beetle. *Funct Ecol.*  
826 2011;25:527–36.
- 827 21. Lehmann P, Lyytinen A, Piironen S, Lindström L. Latitudinal differences in diapause related  
828 photoperiodic responses of European Colorado potato beetles (*Leptinotarsa decemlineata*).  
829 *Evol Ecol.* 2015;29:269–82.
- 830 22. Hsiao TH. Host plant adaptations among geographic populations of the Colorado potato  
831 beetle. *Entomol Exp Appl.* 1978;24:237–47.
- 832 23. Jolivet P. Food habits and food selection of Chrysomelidae. Bionomic and evolutionary  
833 perspectives. In: Jolivet P, Petitpierre E, Hsiao TH, editors. *Biology of the Chrysomelidae.*  
834 Dordrechf: Kluwer Acad. Press; 1988. p. 1–24.
- 835 24. Hsiao TH. Host specificity, seasonality and bionomics of *Leptinotarsa* beetles. *Biology of*  
836 *the Chrysomelidae.* Springer; 1988. p. 581–99.
- 837 25. Hare JD, Kennedy GG. Genetic variation in plant-insect associations: survival of  
838 *Leptinotarsa decemlineata* populations on *Solanum carolinense*. *Evolution.* 1986;40:1031–43.
- 839 26. Jacques Jr. RL, Fasulo TR. Colorado Potato Beetle, *Leptinotarsa decemlineata* (Say) and  
840 False Potato Beetle, *Leptinotarsa juncta* (Germar) (Insecta: Coleoptera: Chrysomelidae). Univ.  
841 Florida IFAS Ext. 2000;EENY146:1–5.
- 842 27. Alyokhin A, and Chen YH. Adaptation to toxic hosts as a factor in the evolution of  
843 insecticide resistance. *Curr Opin Insect Sci.* 2017;21:33–38.
- 844 28. Cárdenas PD, Sonawane PD, Heinig U, Bocobza SE, Burdman S, Aharoni A. The bitter side  
845 of the nightshades: Genomics drives discovery in Solanaceae steroidal alkaloid metabolism.  
846 *Phytochemistry.* 2015;113:24–32.

- 847 29. Milner SE, Brunton NP, Jones PW, Brien NMO, Collins SG, Maguire AR. Bioactivities of  
848 glycoalkaloids and their aglycones from *Solanum* species. J. Agric. Food Chem.  
849 2011;59:3454–84.
- 850 30. Dimock MB, Tingey WM. Host acceptance behaviour of Colorado potato beetle larvae  
851 influenced by potato glandular trichomes. Physiol Entomol. 1988;13:399–406.
- 852 31. Lawrence SD, Novak NG, Ju CJ-T, Cooke JEK. Examining the molecular interaction  
853 between potato (*Solanum tuberosum*) and Colorado potato beetle *Leptinotarsa decemlineata*.  
854 Botany. 2008;86:1080–91.
- 855 32. Petek M, Turnšek N, Gašparič MB, Novak MP, Gruden K, Slapar N, et al. A complex of  
856 genes involved in adaptation of *Leptinotarsa decemlineata* larvae to induced potato defense.  
857 Arch Insect Biochem Physiol. 2012;79:153–81.
- 858 33. Novillo C, Castañera P, Ortego F. Characterization and distribution of chymotrypsin-like and  
859 other digestive proteases in Colorado potato beetle larvae. Arch Insect Biochem Physiol.  
860 1997;36:181–201.
- 861 34. Armer CA. Colorado potato beetle toxins revisited: Evidence the beetle does not sequester  
862 host plant glycoalkaloids. J Chem. Ecol. 2004;30:883–8.
- 863 35. Deroe C, Pasteels JM. Defensive mechanisms against predation in the Colorado beetle  
864 (*Leptinotarsa decemlineata*, Say). Arch Biol Sci. 1977;88:289–304.
- 865 36. Hsiao TH, Fraenkel G. Properties of Leptinotarsin: a toxic hemolymph protein from the  
866 Colorado potato beetle. Toxicon. 1969;7:119–30.
- 867 37. Forgash AJ. Insecticide resistance in the Colorado potato beetle. In: Ferro DN, Voss RH,  
868 editors. Proc Symp Colorado Potato Beetle, XVII Int Congr Entomol. August 1984. Amherst,  
869 MA: Massachusetts Agricultural Experimental Station; 1985. p. 33–52.

- 870 38. Wan P-J, Shi X-Q, Kong Y, Zhou L-T, Guo W-C, Ahmat T, et al. Identification of  
871 cytochrome P450 monooxygenase genes and their expression profiles in cyhalothrin-treated  
872 Colorado potato beetle, *Leptinotarsa decemlineata*. Pestic Biochem Physiol. 2013;107:360–8.
- 873 39. Zhang J, Pelletier Y, Goyer C. Identification of potential detoxification enzyme genes in  
874 *Leptinotarsa decemlineata* (Say) and study of their expression in insects reared on different  
875 plants. J Plant Sci. 2008;88:621–9.
- 876 40. Lü F-G, Fu K-Y, Li Q, Guo W-C, Ahmat T, Li G-Q. Identification of carboxylesterase genes  
877 and their expression profiles in the Colorado potato beetle *Leptinotarsa decemlineata* treated  
878 with fipronil and cyhalothrin. Pestic Biochem Physiol. 2015;122:86–95.
- 879 41. Zhu F, Xu J, Palli R, Ferguson J, Palli SR. Ingested RNA interference for managing the  
880 populations of the Colorado potato beetle, *Leptinotarsa decemlineata*. Pest Manag Sci.  
881 2011;67:175–82.
- 882 42. Clements J, Schoville S, Peterson N, Lan Q, Groves RL. Characterizing molecular  
883 mechanisms of imidacloprid resistance in select populations of *Leptinotarsa decemlineata* in  
884 the Central Sands region of Wisconsin. PLoS One. 2016;11:e0147844.
- 885 43. Kumar A, Congiu L, Lindström L, Piironen S, Vidotto M, Grapputo A. Sequencing, de novo  
886 assembly and annotation of the Colorado potato beetle, *Leptinotarsa decemlineata*,  
887 transcriptome. PLoS One. 2014;9:e86012.
- 888 44. Rinkevich FD, Su C, Lazo TA, Hawthorne DJ, Tingey WM, Naimov S, et al. Multiple  
889 evolutionary origins of knockdown resistance (kdr) in pyrethroid-resistant Colorado potato  
890 beetle, *Leptinotarsa decemlineata*. Pestic Biochem Physiol. 2012;104:192–200.

- 891 45. Zhou LT, Jia S, Wan PJ, Kong Y, Guo WC, Ahmat T, et al. RNA interference of a putative  
892 S-adenosyl-L-homocysteine hydrolase gene affects larval performance in *Leptinotarsa*  
893 *decemlineata* (Say). J Insect Physiol. 2013;59:1049–56.
- 894 46. Zhang J, Khan SA, Hasse C, Ruf S, Heckel DG, Bock R. Full crop protection from an insect  
895 pest by expression of long double-stranded RNAs in plastids. Science 2015;347:991-994.
- 896 47. Mota-Sanchez D, Hollingworth RM, Grafius EJ, Moyer DD. Resistance and cross-resistance  
897 to neonicotinoid insecticides and spinosad in the Colorado potato beetle, *Leptinotarsa*  
898 *decemlineata* (Say) (Coleoptera: Chrysomelidae). Pest Manag Sci. 2006;62:30–7.
- 899 48. Zhu F, Moural TW, Nelson DR, Palli SR. A specialist herbivore pest adaptation to  
900 xenobiotics through up-regulation of multiple Cytochrome P450s. Sci. Rep. 2016;6:20421.
- 901 49. Butler J, MacCallum I, Kleber M, Shlyakhter IA, Belmonte MK, Lander ES, et al.  
902 ALLPATHS: de novo assembly of whole-genome shotgun microreads. Genome Res.  
903 2008;18:810–20.
- 904 50. Gregory TR. Animal genome size database [Internet]. 2017. Available from:  
905 <http://www.genomesize.com>
- 906 51. Tribolium Genome Sequencing Consortium. The genome of the model beetle and pest  
907 *Tribolium castaneum*. Nature. 2008;452:949–55.
- 908 52. Keeling CI, Yuen MM, Liao NY, Docking TR, Chan SK, Taylor GA, et al. Draft genome of  
909 the mountain pine beetle, *Dendroctonus ponderosae* Hopkins, a major forest pest. Genome  
910 Biol. 2013;14(3):R27.
- 911 53. Cunningham CB, Ji L, Wiberg RAW, Shelton J, McKinney EC, Parker DJ, et al. The genome  
912 and methylome of a beetle with complex social behavior, *Nicrophorus vespilloides*  
913 (Coleoptera: Silphidae). Genome Biol Evol 2015;7(12):3383-3396.



- 914 54. McKenna DD, Scully ED, Pauchet Y, Hoover K, Kirsch R, Geib SM, et al. Genome of the  
915 Asian longhorned beetle (*Anoplophora glabripennis*), a globally significant invasive species,  
916 reveals key functional and evolutionary innovations at the beetle–plant interface. *Genome Biol.*  
917 2016;17:227.
- 918 55. Vega FE, Brown SM, Chen H, Shen E, Nair MB, Ceja-Navarro JA, et al. Draft genome of  
919 the most devastating insect pest of coffee worldwide: the coffee berry borer, *Hypothenemus*  
920 *hampei*. *Sci Rep.* 2015;5:12525.
- 921 56. Petitpierre E, Segarra C, Juan C. Genome size and chromosomal evolution in leaf beetles  
922 (Coleoptera , Chrysomelidae ). *Hereditas.* 1993;6:1–6.
- 923 57. Prysycz LP, Gabaldón T. Redundans: an assembly pipeline for highly heterozygous genomes.  
924 *Nucleic Acids Res.* 2016;44:e113–e113.
- 925 58. Denton JF, Lugo-Martinez J, Tucker AE, Schrider DR, Warren WC, Hahn MW. Extensive  
926 error in the number of genes inferred from draft genome assemblies. *PLoS Comput Biol.*  
927 2014;10(12):e1003998.
- 928 59. Simão FA, Waterhouse RM, Ioannidis P, Kriventseva E V., Zdobnov EM. BUSCO:  
929 assessing genome assembly and annotation completeness with single-copy orthologs.  
930 *Bioinformatics.* 2015;31:3210–2.
- 931 60. Gruden K, Štrukelj B, Popovič T, Lenarčič B, Bevec T, Brzin J, et al. The cysteine protease  
932 activity of Colorado potato beetle (*Leptinotarsa decemlineata* Say) guts, which is insensitive to  
933 potato protease inhibitors, is inhibited by thyroglobulin type-1 domain inhibitors. *Insect*  
934 *Biochem Mol Biol.* 1998;28:549–60.
- 935 61. Smilanich AM, Dyer LA, Chambers JQ, Bowers MD. Immunological cost of chemical  
936 defence and the evolution of herbivore diet breadth. *Ecol Lett.* 2009;12:612–21.

- 937 62. Vidal NM, Grazziotin AL, Iyer LM, Aravind L, Venancio TM. Transcription factors,  
938 chromatin proteins and the diversification of Hemiptera. *Insect Biochem Mol Biol.* 2016;69:1–  
939 13.
- 940 63. Najafabadi HS, Mnaimneh S, Schmitges FW, Garton M, Lam KN, Yang A, et al. C2H2 zinc  
941 finger proteins greatly expand the human regulatory lexicon. *Nat Biotech.* 2015;33:555–62.
- 942 64. Chénais B, Caruso A, Hiard S, Casse N. The impact of transposable elements on eukaryotic  
943 genomes: from genome size increase to genetic adaptation to stressful environments. *Gene.*  
944 2012;509:7–15.
- 945 65. Tu Z. Insect Transposable Elements. In: Gilbert LI, editor. *Insect Molecular Biology and*  
946 *Biochemistry.* London, U. K.: Academic Press; 2012.
- 947 66. Biémont C, Vieira C. Genetics: junk DNA as an evolutionary force. *Nature.* 2006;443:521–4.
- 948 67. González J, Petrov DA. The adaptive role of transposable elements in the *Drosophila*  
949 genome. *Gene.* 2009;448:124–33.
- 950 68. Bourque G, Leong B, Vega VB, Chen X, Lee YL, Srinivasan KG, et al. Evolution of the  
951 mammalian transcription factor binding repertoire via transposable elements. *Genome Res.*  
952 2008;18:1752–62.
- 953 69. Cordaux R, Batzer MA. The impact of retrotransposons on human genome evolution. *Nat*  
954 *Rev Genet.* 2009;10:691–703.
- 955 70. González J, Petrov DA. The adaptive role of transposable elements in the *Drosophila*  
956 genome. *Gene.* 2009;448:124–33.
- 957 71. Lavoie CA, Platt RN, Novick PA, Counterman BA, Ray DA. Transposable element  
958 evolution in *Heliconius* suggests genome diversity within Lepidoptera. *Mob DNA.* 2013;4:21.

- 959 72. Osanai-Futahashi M, Suetsugu Y, Mita K, Fujiwara H. Genome-wide screening and  
960 characterization of transposable elements and their distribution analysis in the silkworm,  
961 *Bombyx mori*. *Insect Biochem Mol Biol*. 2008;38:1046–57.
- 962 73. Schrader L, Kim JW, Ence D, Zimin A, Klein A, Wyschetzki K, et al. Transposable element  
963 islands facilitate adaptation to novel environments in an invasive species. *Nat Commun*.  
964 2014;5.
- 965 74. González J, Karasov TL, Messer PW, Petrov DA. Genome-wide patterns of adaptation to  
966 temperate environments associated with transposable elements in *Drosophila*. *PLoS Genet*.  
967 2010;6:e1000905.
- 968 75. Cridland JM, Thornton KR, Long AD. Gene expression variation in *Drosophila*  
969 *melanogaster* due to rare transposable element insertion alleles of large effect. *Genetics*.  
970 2015;199:85–93.
- 971 76. Daborn PJ, Yen JL, Bogwitz MR, Le Goff G, Feil E, Jeffers S, et al. A single P450 allele  
972 associated with insecticide resistance in *Drosophila*. *Science*. 2002;297:2253–6.
- 973 77. Messer PW, Petrov DA. Population genomics of rapid adaptation by soft selective sweeps.  
974 *Trends Ecol Evol* 2013;28(11):659-669.
- 975 78. Aquadro CF, Bauer DuMont V, Reed FA. Genome-wide variation in the human and fruitfly:  
976 a comparison. *Curr Opin Genet Dev*. 2001;11:627–34.
- 977 79. International Chicken Polymorphism Map Consortium. A genetic variation map for chicken  
978 with 2.8 million single-nucleotide polymorphisms. *Nature*. 2004;432:717–22.
- 979 80. Choi J-H, Kijimoto T, Snell-Rood E, Tae H, Yang Y, Moczek AP, et al. Gene discovery in  
980 the horned beetle *Onthophagus taurus*. *BMC Genomics* 2010;11(1):703.

- 981 81. Morlais I, Ponçon N, Simard F, Cohuet A, Fontenille D. Intraspecific nucleotide variation in  
982 *Anopheles gambiae*: new insights into the biology of malaria vectors. Am J Trop Med Hyg.  
983 2004;71:795–802.
- 984 82. Campos JL, Zhao L, Charlesworth B. Estimating the parameters of background selection and  
985 selective sweeps in *Drosophila* in the presence of gene conversion. Proc Natl Acad Sci U S A.  
986 2017;114:E4762–71.
- 987 83. Dangles O, Irschick D, Chittka L, Casas J. Variability in sensory ecology: expanding the  
988 bridge between physiology and evolutionary biology. Q Rev Biol. 2009;84:51–74.
- 989 84. Matsuura H, Sokabe T, Kohno K, Tominaga M, Kadowaki T. Evolutionary conservation and  
990 changes in insect TRP channels. BMC Evol Biol. 2009;9:228.
- 991 85. Venkatachalam K, Montell C. TRP channels. Annu. Rev. Biochem. 2007;76:387–417.
- 992 86. Nesterov A, Spalhoff C, Kandasamy R, Katana R, Rankl NB, Andrés M, et al. TRP channels  
993 in insect stretch receptors as insecticide targets. Neuron. 2015;86:665–71.
- 994 87. Hauser F, Cazzamali G, Williamson M, Park Y, Li B, Tanaka Y, et al. A genome-wide  
995 inventory of neurohormone GPCRs in the red flour beetle *Tribolium castaneum*. Front  
996 Neuroendocrinol. 2008;29:142–65.
- 997 88. Nishi Y, Sasaki K, Miyatake T. Biogenic amines, caffeine and tonic immobility in *Tribolium*  
998 *castaneum*. J Insect Physiol. 2010;56:622–8.
- 999 89. Roeder T. Biochemistry and molecular biology of receptors for biogenic amines in locusts.  
1000 Microsc Res Tech. 2002;56:237–47.
- 1001 90. Schoonhoven L, Van Loon JJA, Dicke M. Insect–Plant Biology. 2nd Ed. Oxford, U. K.:  
1002 Oxford University Press; 2005.

- 1003 91. Leal WS. Odorant reception in insects: roles of receptors, binding proteins, and degrading  
1004 enzymes. *Annu Rev Entomol.* 2013;58:373–91.
- 1005 92. Pelosi P, Zhou J-J, Ban LP, Calvello M. Soluble proteins in insect chemical communication.  
1006 *Cell Mol Life Sci.* 2006;63:1658–76.
- 1007 93. Robertson HM, Warr CG, Carlson JR. Molecular evolution of the insect chemoreceptor gene  
1008 superfamily in *Drosophila melanogaster*. *Proc Natl Acad Sci U S A.* 2003;14537–42.
- 1009 94. Sato K, Tanaka K, Touhara K. Sugar-regulated cation channel formed by an insect gustatory  
1010 receptor. *Proc Natl Acad Sci U S A.* 2011;108:11680–5.
- 1011 95. Rytz R, Croset V, Benton R. Ionotropic Receptors (IRs): Chemosensory ionotropic glutamate  
1012 receptors in *Drosophila* and beyond. *Insect Biochem Mol Biol.* 2013;43:888–97.
- 1013 96. Jackowska M, Bao R, Liu Z, McDonald EC., Cook TA, Friedrich M. Genomic and gene  
1014 regulatory signatures of cryptozoic adaptation: Loss of blue sensitive photoreceptors through  
1015 expansion of long wavelength-opsin expression in the red flour beetle *Tribolium castaneum*.  
1016 *Front Zool.* 2007;4:24.
- 1017 97. Sharkey CR, Fujimoto MS, Lord NP, Shin S, McKenna DD, Suvorov A, et al. Overcoming  
1018 the loss of blue sensitivity through opsin duplication in the largest animal group, beetles. *Sci*  
1019 *Rep.* 2017;7:8.
- 1020 98. Izzo VM, Mercer N, Armstrong J, Chen YH. Variation in host usage among geographic  
1021 populations of *Leptinotarsa decemlineata*, the Colorado potato beetle. *J Pest Sci.* 2014;87:597–  
1022 608.
- 1023 99. Otálora-Luna F, Dickens JC. Multimodal stimulation of Colorado potato beetle reveals  
1024 modulation of pheromone response by yellow light. *PLoS One.* 2011;6:e20990.

- 1025 100. Briscoe AD, Chittka L. The evolution of color vision in insects. *Annu Rev Entomol.*  
1026 2001;46:471–510.
- 1027 101. Leung NY, Montell C. Unconventional roles of opsins. *Annu Rev Cell Dev Biol.* 2017;33.
- 1028 102. Price PW, Denno RF, Eubanks MD, Finke DL, Kaplan I. *Insect Ecology: Behavior,*  
1029 *Populations and Communities.* New York, NY: Cambridge University Press.; 2011.
- 1030 103. Martinez M, Santamaria M, Diaz-Mendoza M, Arnaiz A, Carrillo L, Ortego F, et al.  
1031 *Phytocystatins: defense proteins against phytophagous insects and Acari.* *Int J Mol Sci.*  
1032 2016;17:1747.
- 1033 104. Wolfson JL, Murdock LL. Suppression of larval Colorado potato beetle growth and  
1034 development by digestive proteinase inhibitors. *Entomol Exp Appl.* 1987;44:235–40.
- 1035 105. Bolter CJ, Jongsma MA. Colorado potato beetles (*Leptinotarsa decemlineata*) adapt to  
1036 proteinase inhibitors induced in potato leaves by methyl jasmonate. *J Insect Physiol.*  
1037 1995;41:1071–8.
- 1038 106. Murdock LL, Brookhart G, Dunn PE, Foard DE, Kelley S, Kitch L, et al. Cysteine digestive  
1039 proteinases in Coleoptera. *Biochem Physiol.* 1987;87:783–7.
- 1040 107. Chye M-L, Sin S-F, Xu Z-F, Yeung EC. Serine proteinase inhibitor proteins: Exogenous  
1041 and endogenous functions. *Vitr Cell Dev Biol-Plant.* 2006;42:100–8.
- 1042 108. Gruden K, Popovič T, Cimerman N, Križaj I, Štrukelj B. Diverse enzymatic specificities of  
1043 digestive proteases, “intestains”, enable Colorado potato beetle larvae to counteract the potato  
1044 defence mechanism. *Biol Chem.* 2003;384:305–10.
- 1045 109. Gruden K, Kuipers AG., Gunčar G, Slapar N, Štrukelj B, Jongsma MA. Molecular basis of  
1046 Colorado potato beetle adaptation to potato plant defence at the level of digestive cysteine  
1047 proteinases. *Insect Biochem Mol Biol.* 2004;34:365–75.

- 1048 110. Goptar IA, Semashko TA, Danilenko SA, Lysogorskaya EN, Oksenoit ES, Zhuzhikov DP,  
1049 et al. Cysteine digestive peptidases function as post-glutamine cleaving enzymes in tenebrionid  
1050 stored-product pests. *Comp Biochem Physiol Part B* 2012;161:148–54.
- 1051 111. Turk V, Stoka V, Vasiljeva O, Renko M, Sun T, Turk B, et al. Cysteine cathepsins: From  
1052 structure, function and regulation to new frontiers. *Biochim Biophys Acta - Proteins  
1053 Proteomics*. 2012;1824:68–88.
- 1054 112. Marchler-Bauer A, Derbyshire MK, Gonzales NR, Lu S, Chitsaz F, Geer LY, et al. CDD:  
1055 NCBI's conserved domain database. *Nucleic Acids Res*. 2014;43:D222-D226.
- 1056 113. Finn RD, Bateman A, Clements J, Coghill P, Eberhardt RY, Eddy SR, et al. Pfam: the  
1057 protein families database. *Nucleic Acids Res*. 2013;42: D222-D230.
- 1058 114. Wex T, Lipyansky A, Brömme NC, Wex H, Guan XQ, Brömme D. TIN-ag-RP, a novel  
1059 catalytically inactive cathepsin B-related protein with EGF domains, is predominantly  
1060 expressed in vascular smooth muscle cells†. *Biochemistry*. 2001;40:1350–7.
- 1061 115. Yamamoto Y, Kurata M, Watabe S, Murakami R, Takahashi SY. Novel cysteine proteinase  
1062 inhibitors homologous to the proregions of cysteine proteinases. *Curr Protein Pept Sci*.  
1063 2002;3:231–8.
- 1064 116. Sainsbury F, Rhéaume A-J, Goulet M-C, Vorster J, Michaud D. Discrimination of  
1065 differentially inhibited cysteine proteases by activity-based profiling using cystatin variants  
1066 with tailored specificities. *J Proteome Res*. 2012;11:5983–93.
- 1067 117. Martynov AG, Elpidina EN, Perkin L, Oppert B. Functional analysis of C1 family cysteine  
1068 peptidases in the larval gut of *Tenebrio molitor* and *Tribolium castaneum*. *BMC Genomics*.  
1069 2015;16:75.

- 1070 118. Levasseur A, Drula E, Lombard V, Coutinho PM, Henrissat B. Expansion of the enzymatic  
1071 repertoire of the CAZy database to integrate auxiliary redox enzymes. *Biotechnol Biofuels*  
1072 2013;6(1):41.
- 1073 119. Scully ED, Hoover K, Carlson JE, Tien M, Geib SM. Mid-gut transcriptome profiling of  
1074 *Anoplophora glabripennis*, a lignocellulose degrading cerambycid beetle. *BMC Genomics*.  
1075 2013;14:850.
- 1076 120. Kirsch R, Gramzow L, Theißen G, Siegfried BD, Heckel DG, Pauchet Y. Horizontal gene  
1077 transfer and functional diversification of plant cell wall degrading polygalacturonases: key  
1078 events in the evolution of herbivory in beetles. *Insect Biochem Mol Biol*. 2014;52:33–50.
- 1079 121. Pauchet Y, Wilkinson P, Chauhan R, Ffrench-Constant RH. Diversity of beetle genes  
1080 encoding novel plant cell wall degrading enzymes. *PloS One* 2010;5:e15635.
- 1081 122. Meyer UA. Overview of enzymes of drug metabolism. *J Pharmacokinet Pharmacodyn*  
1082 1996;24(5):449-459.
- 1083 123. Bloomquist JR. Chloride channels as tools for developing selective insecticides. *Arch Insect*  
1084 *Biochem Physiol*. 2003;54:145–56.
- 1085 124. Le Goff G, Hamon A, Bergé J-B, Amichot M. Resistance to fipronil in *Drosophila*  
1086 *simulans*: influence of two point mutations in the RDL GABA receptor subunit. *J Neurochem*.  
1087 2005;92:1295–305.
- 1088 125. Jones AK, Sattelle DB. The cys-loop ligand-gated ion channel gene superfamily of the  
1089 nematode, *Caenorhabditis elegans*. *Invert Neurosci*. 2008;8:41–7.
- 1090 126. Jones AK, Sattelle DB. Diversity of insect nicotinic acetylcholine receptor subunits. In:  
1091 Thany SH, editor. *Insect Nicotinic Acetylcholine Receptors*. New York, NY: Springer New  
1092 York; 2010. p. 25–43.



- 1093 127. Ffrench-Constant RH, Mortlock DP, Shaffer CD, MacIntyre RJ, Roush RT. Molecular  
1094 cloning and transformation of cyclodiene resistance in *Drosophila*: an invertebrate gamma-  
1095 aminobutyric acid subtype A receptor locus. Proc Natl Acad Sci U S A. 1991;88:7209–13.
- 1096 128. Ffrench-Constant RH, Rocheleau TA. *Drosophila*  $\gamma$ -aminobutyric acid receptor gene Rdl  
1097 shows extensive alternative splicing. J Neurochem. 1993;60:2323–6.
- 1098 129. Buckingham SD, Biggin PC, Sattelle BM, Brown LA, Sattelle DB. Insect GABA receptors:  
1099 splicing, editing, and targeting by antiparasitics and insecticides. Mol Pharmacol.  
1100 2005;68:942–51.
- 1101 130. Clements J, Schoville S, Peterson N, Lan Q, Groves RL. Characterizing molecular  
1102 mechanisms of Imidacloprid resistance in select populations of *Leptinotarsa decemlineata* in  
1103 the Central Sands Region of Wisconsin. PLoS One. 2016;11:e0147844.
- 1104 131. Clements J, Schoville S, Peterson N, Huseth AS, Lan Q, Groves RL. RNA interference of  
1105 three up-regulated transcripts associated with insecticide resistance in an imidacloprid resistant  
1106 population of *Leptinotarsa decemlineata*. Pestic Biochem Physiol. 2017;135:35–40.
- 1107 132. Willis JH. Structural cuticular proteins from arthropods: Annotation, nomenclature, and  
1108 sequence characteristics in the genomics era. Insect Biochem Mol Biol. 2010;40:189–204.
- 1109 133. McDonnell CM, King D, Comeron JM, Li H, Sun W, Berenbaum MR, et al. Evolutionary  
1110 toxicogenomics: diversification of the Cyp12d1 and Cyp12d3 Genes in *Drosophila* species. J  
1111 Mol Evol. 2012;74:281–96.
- 1112 134. Hu F, Dou W, Wang J-J, Jia F-X, Wang J-J. Multiple glutathione S-transferase genes:  
1113 identification and expression in oriental fruit fly, *Bactrocera dorsalis*. Pest Manag Sci.  
1114 2014;70:295–303.

- 1115 135. Han J-B, Li G-Q, Wan P-J, Zhu T-T, Meng Q-W. Identification of glutathione S-transferase  
1116 genes in *Leptinotarsa decemlineata* and their expression patterns under stress of three  
1117 insecticides. *Pestic Biochem Physiol.* 2016;133:26–34.
- 1118 136. Fire A, Xu S, Montgomery MK, Kostas SA, Driver SE, Mello CC. Potent and specific  
1119 genetic interference by double-stranded RNA in *Caenorhabditis elegans*. *Nature.*  
1120 1998;391:806–11.
- 1121 137. Siomi H, Siomi MC. On the road to reading the RNA-interference code. *Nature.*  
1122 2009;457:396–404.
- 1123 138. Revuelta L, Ortego F, Díaz-Ruíz JR, Castañera P, Tenllado F, Hernández-Crespo P.  
1124 Contribution of *ldace1* gene to acetylcholinesterase activity in Colorado potato beetle. *Insect*  
1125 *Biochem Mol Biol.* 2011;
- 1126 139. Wan P-J, Fu K-Y, Lü F-G, Guo W-C, Li G-Q. Knockdown of a putative alanine  
1127 aminotransferase gene affects amino acid content and flight capacity in the Colorado potato  
1128 beetle *Leptinotarsa decemlineata*. *Amino Acids.* 2015;47:1445–54.
- 1129 140. Baum JA, Bogaert T, Clinton W, Heck GR, Feldmann P, Ilagan O, et al. Control of  
1130 coleopteran insect pests through RNA interference. *Nat Biotechnol.* 2007;25:1322.
- 1131 141. Swevers L, Huvenne H, Menschaert G, Kontogiannatos D, Kourti a., Pauchet Y, et al.  
1132 Colorado potato beetle (Coleoptera) gut transcriptome analysis: expression of RNA  
1133 interference-related genes. *Insect Mol Biol.* 2013;22:668–84.
- 1134 142. Bernstein E, Caudy AA, Hammond SM, Hannon GJ. Role for a bidentate ribonuclease in  
1135 the initiation step of RNA interference. *Nature.* 2001;409:363–6.

- 1136 143. Grishok A, Pasquinelli AE, Conte D, Li N, Parrish S, Ha I, et al. Genes and mechanisms  
1137 related to RNA interference regulate expression of the small temporal RNAs that control *C.*  
1138 *elegans* developmental timing. *Cell*. 2001;106:23–34.
- 1139 144. Yoon J-S, Shukla JN, Gong ZJ, Mogilicherla K., and Palli SR. RNA interference in the  
1140 Colorado potato beetle, *Leptinotarsa decemlineata*: Identification of key contributors. *Insect*  
1141 *Biochem Mol Biol*. 2016;78:78-88.
- 1142 145. Guénin H-A, Scherler M. La formule chromosomiale du doryphore *Leptinotarsa*  
1143 *decemlineata* Stål. *Rev Suisse Zool*. 1951;58:359–70.
- 1144 146. Hsiao TH, Hsiao C. Chromosomal analysis of *Leptinotarsa* and *Labidomera* species.  
1145 *Genetica*. 1983;60:139–50.
- 1146 147. Poelchau M, Childers C, Moore G, Tsavatapalli V, Evans J, Lee C-Y, et al. The i5k  
1147 Workspace@NAL—enabling genomic data access, visualization and curation of arthropod  
1148 genomes. *Nucleic Acids Res* 2015;43(D1):D714-D719.
- 1149 148. Marcais G, Kingsford C. A fast, lock-free approach for efficient parallel counting of  
1150 occurrences of k-mers. *Bioinformatics* 2011;27:764-770.
- 1151 149. Holt C, Yandell M. MAKER2: an annotation pipeline and genome-database management  
1152 tool for second-generation genome projects. *BMC Bioinformatics*. 2011;12:491.
- 1153 150. Lee E, Helt GA, Reese JT, Munoz-Torres MC, Childers CP, Buels RM, et al. Web Apollo:  
1154 a web-based genomic annotation editing platform. *Genome Biol*. 2013;14:R93.
- 1155 151. Adams MD, Celniker SE, Holt RA, Evans CA, Gocayne JD, Amanatides PG, et al. The  
1156 genome sequence of *Drosophila melanogaster*. *Science* 2000;287(5461):2185-2195.
- 1157 152. Camacho C, Coulouris G, Avagyan V, Ma N, Papadopoulos J, Bealer K, et al. BLAST+:  
1158 architecture and applications. *BMC Bioinformatics*. 2009;10:421.

- 1159 153. Altschul SF, Gish W, Miller W, Myers EW, Lipman DJ. Basic local alignment search tool.  
1160 J Mol Biol. 1990;215:403–10.
- 1161 154. Larkin MA, Blackshields G, Brown NP, Chenna R, McGettigan PA, McWilliam H, et al.  
1162 Clustal W and Clustal X version 2.0. *Bioinformatics*. 2007;23:2947–8.
- 1163 155. Laetsch DR, Blaxter ML. BlobTools: Interrogation of genome assemblies. *F1000Research*.  
1164 2017;6:1287.
- 1165 156. Buchfink B, Xie C, Huson D. Fast and sensitive protein alignment using DIAMOND.  
1166 *Nature Methods*. 2015;12:59–60.
- 1167 157. The UniProt Consortium. UniProt: the universal protein knowledgebase. *Nucleic Acids Res*.  
1168 2017;45:D158–D169.
- 1169 158. Li H, Durbin R. Fast and accurate short read alignment with Burrows-Wheeler transform.  
1170 *Bioinformatics*. 2009;25:1754–60.
- 1171 159. Kriventseva E V, Tegenfeldt F, Petty TJ, Waterhouse RM, Simão FA, Pozdnyakov IA, et al.  
1172 OrthoDB v8: update of the hierarchical catalog of orthologs and the underlying free software.  
1173 *Nucleic Acids Res*. 2015;43:D250–D256.
- 1174 160. Mirarab S, Nguyen N, Guo S, Wang L-S, Kim J, Warnow T. PASTA: ultra-large multiple  
1175 sequence alignment for nucleotide and amino-acid sequences. *J Comput Biol*. 2015;22:377–86.
- 1176 161. Stamatakis A. RAxML version 8: a tool for phylogenetic analysis and post-analysis of large  
1177 phylogenies. *Bioinformatics*. 2014;2010–1.
- 1178 162. Mirarab S, Warnow T. ASTRAL-II: coalescent-based species tree estimation with many  
1179 hundreds of taxa and thousands of genes. *Bioinformatics*. 2015;31:i44–i52.
- 1180 163. Sanderson MJ. r8s: inferring absolute rates of molecular evolution and divergence times in  
1181 the absence of a molecular clock. *Bioinformatics*. 2003;19:301–2.

- 1182 164. Wolfe JM, Daley AC, Legg DA, Edgecombe GD. Fossil calibrations for the arthropod Tree  
1183 of Life. *Earth-Sci Rev* 2016;160(Supp. C):43-110.
- 1184 165. Han M V, Thomas GWC, Lugo-Martinez J, Hahn MW. Estimating gene gain and loss rates  
1185 in the presence of error in genome assembly and annotation using CAFE 3. *Mol Biol Evol.*  
1186 2013;30:1987–97.
- 1187 166. Rosendale AJ, Romick-Rosendale LE, Watanabe M, Dunlevy ME, Benoit JB. Mechanistic  
1188 underpinnings of dehydration stress in the American dog tick revealed through RNA-seq and  
1189 metabolomics. *J Exp Biol.* 2016;219:1808–19.
- 1190 167. Baggerly KA, Deng L, Morris JS, Aldaz CM. Differential expression in SAGE: accounting  
1191 for normal between-library variation. *Bioinformatics.* 2003;19:1477–83.
- 1192 168. Smit, AFA, Hubley, R & Green P. RepeatMasker Open-4.0.
- 1193 169. Smit A, Hubley R. RepeatModeler Open-1.0.
- 1194 170. Langmead B, Salzberg SL. Fast gapped-read alignment with Bowtie 2. *Nat. Methods.*  
1195 2012;9:357.
- 1196 171. Li H, Handsaker B, Wysoker A, Fennell T, Ruan J, Homer N, et al. The sequence  
1197 alignment/map format and SAMtools. *Bioinformatics.* 2009;25:2078–9.
- 1198 172. Danecek P, Auton A, Abecasis G, Albers CA, Banks E, DePristo MA, et al. The variant call  
1199 format and VCFtools. *Bioinformatics.* 2011;27:2156–8.
- 1200 173. Pickrell JK, Pritchard JK. Inference of population splits and mixtures from genome-wide  
1201 allele frequency data. *PLoS Genet.* 2012;8:e1002967.
- 1202 174. Gutenkunst RN, Hernandez RD, Williamson SH, Bustamante CD. Inferring the joint  
1203 demographic history of multiple populations from multidimensional SNP frequency data.  
1204 *PLoS Genet.* 2009;5:e1000695.

1205 175. Jacques Jr RL. The Potato Beetles. Flora Fauna Handbook. No. 3. Taylor & Francis; 1988

1206

1207 **Acknowledgements:** We sincerely thank the sequencing, assembly and annotation teams at  
1208 the Baylor College of Medicine Human Genome Sequencing Center for their efforts. We would  
1209 like to acknowledge the following funding sources: sequencing, assembly and automated  
1210 annotation was supported by NIH grant NHGRI U54 HG003273 to RAG; the UVM Agricultural  
1211 Experiment Station Hatch grant to YHC (VT-H02010); the NIH postdoctoral training grant to  
1212 RFM (K12 GM000708); MMT's work with Apollo was supported by NIH grants  
1213 (5R01GM080203 from NIGMS, and 5R01HG004483 from NHGRI) and by the Director, Office  
1214 of Science, Office of Basic Energy Sciences, of the U.S. Department of Energy (contract No.  
1215 DE-AC02-05CH11231); the National Science Centre (2012/07/D/NZ2/04286) and Ministry of  
1216 Science and Higher Education scholarship to AM. Mention of trade names or commercial  
1217 products in this publication is solely for the purpose of providing specific information and does  
1218 not imply recommendation or endorsement by the U.S. Department of Agriculture. USDA is an  
1219 equal opportunity provider and employer.

1220

1221 **Authors' contributions:** MNA, AB, JHB, KC, AKC, OC, EMD, ENE, PE, MF, IG-R, CG, AG,  
1222 MG, BH, ECJ, JWJ, MK, SAK, AK, FL, VL, XM, AM, NJM, RFM, BO, SRP, KAP, YP, LCP,  
1223 MP, ÉR, JPR, HMR, AJR, VMR-A, GS, AST, IMVJ, ADY, GDY, and J-SY contributed to the  
1224 manual annotation effort, data analysis, and data interpretation, in addition to reading and  
1225 approving the final manuscript. SDS and YHC coordinated the project and drafted the  
1226 manuscript. SR and RAG coordinated genome sequencing, assembly and automated annotation  
1227 at the Baylor College of Medicine Human Genome Sequencing Center. MFP, CC, MMT, and M-  
1228 JMC coordinated the biocuration of the genome. GWCT generated the phylogeny and conducted  
1229 the gene family analysis. MTW conducted the transcription factor analysis. AG, KG, MP, and

1230 SZ contributed additional RNAseq data. JBB coordinated the RNAseq data analysis. KB, AM,  
1231 and YHC conducted the transposable element analysis. SDS and JC conducted the population  
1232 genetics analysis.

1233

1234 **Competing interests:** The authors declare that they have no competing interests.

1235

1236 **Availability of data and material:** All data generated or analyzed during this study have been  
1237 made publicly available (see Methods for NCBI accession numbers), or included in this  
1238 published article and its supplementary information. The genome assembly and official gene sets  
1239 can be accessed at: [https://data.nal.usda.gov/dataset/leptinotarsa-decemlineata-genome-assembly-10\\_5667](https://data.nal.usda.gov/dataset/leptinotarsa-decemlineata-genome-assembly-10_5667),  
1240 [https://data.nal.usda.gov/dataset/leptinotarsa-decemlineata-genome-annotations-v053\\_5668](https://data.nal.usda.gov/dataset/leptinotarsa-decemlineata-genome-annotations-v053_5668) and  
1241 <https://data.nal.usda.gov/dataset/leptinotarsa-decemlineata-official-gene-set-v11>.

1242

## 1244 **Figure Legend**

1245 **Figure 1.** Ultrametric tree with branch lengths in millions of years for *Leptinotarsa decemlineata*  
1246 relative to five other Coleoptera genomes. The *L. decemlineata* lineage is shown in orange.  
1247 Branches are labeled with their length in years (top) and with the number of gene family  
1248 expansions (blue) and contractions (purple) that occurred on that lineage. Rapid changes for both  
1249 types are in parentheses.

1250 **Figure 2.** Heatmap distribution of the abundance of transcription factor families in *Leptinotarsa*  
1251 *decemlineata* compared to other insects. Each entry indicates the number of TF genes for the  
1252 given family per genome, based on presence of predicted DNA binding domains. Color scale is



1253 log (base 2) and the key is depicted at the top (light blue means the TF family is completely  
1254 absent). Families discussed in the main text are indicated by arrows.

1255 **Figure 3.** Volcano plots showing statistically significant gene expression differences after  
1256 Bonferroni correction in *Leptinotarsa decemlineata*. A) Mid -gut tissue versus whole larvae, B)  
1257 an adult male versus an adult female, C) an adult male versus whole larvae, and D) an adult  
1258 female versus whole larvae. Points outside the gray area indicate >100-fold-differences in  
1259 expression. Blue points indicate down-regulated genes and red points indicate up-regulated genes  
1260 in each contrast.

1261 **Figure 4.** Population genetic relationships and relative rates of genetic drift among *Leptinotarsa*  
1262 *decemlineata* pest populations based on single nucleotide polymorphism data. Population codes:  
1263 NJ- New Jersey lab strain, WIs- imidacloprid susceptible population from Arlington, Wisconsin,  
1264 WIr- imidacloprid resistant population from Hancock, Wisconsin, MI- imidacloprid resistant  
1265 population from Michigan, and EU- European samples combined from Italy and Russia.

1266 **Figure 5.** Phylogenetic relationships of the cysteine peptidase gene family in *Leptinotarsa*  
1267 *decemlineata* compared to model insects. Species abbreviations are: *L. decemlineata* (Ld, green  
1268 color), *Drosophila melanogaster* (Dm, blue color), *Apis mellifera* (Am, purple color), and  
1269 *Tribolium castaneum* (Tc, red color). Mid-gut gene expression (TPM) of highly expressed *L.*  
1270 *decemlineata* cysteine peptidases is shown as bar graphs across three replicate treatments.

1271

1272 **Table 1:** Summary of gene gain and loss events inferred after correcting for annotation and  
 1273 assembly error across six Coleoptera species. The number of rapidly evolving families is shown  
 1274 in parentheses for each type of change and the rate is genes per million years.

|                                  | Expansions |              |      | Contractions |            |      | No Change | Average Expansion |
|----------------------------------|------------|--------------|------|--------------|------------|------|-----------|-------------------|
|                                  | Families   | Genes gained | Rate | Families     | Genes lost | Rate |           |                   |
| <i>Anoplophora glabripennis</i>  | 865 (13)   | 1231         | 1.42 | 1988 (107)   | 3125       | 1.57 | 5850      | -0.182341         |
| <i>Agrilus plannipennis</i>      | 739 (100)  | 1991         | 2.69 | 707 (8)      | 769        | 1.09 | 7257      | 0.119108          |
| <i>Dendroctonus ponderosae</i>   | 933 (72)   | 1982         | 2.12 | 1606 (21)    | 1887       | 1.17 | 6164      | 0.006438          |
| <i>Leptinotarsa decemlineata</i> | 426 (40)   | 855          | 2.01 | 1556 (48)    | 2116       | 1.36 | 6721      | -0.127501         |
| <i>Onthophagus taurus</i>        | 1299 (142) | 2952         | 2.27 | 767 (24)     | 895        | 1.17 | 6637      | 0.203380          |
| <i>Tribolium castaneum</i>       | 786 (51)   | 1428         | 1.82 | 516 (27)     | 909        | 1.76 | 7401      | 0.055645          |

1275

1276 **Table 2.** Numbers of putatively functional proteins in four chemosensory families in

1277 *Leptinotarsa decemlineata* and other beetle species.

| Species                          | Odorant Binding Proteins (OBPs) | Olfactory Receptors (ORs) | Gustatory Receptors (GRs) | Ionotropic Receptors (IRs) |
|----------------------------------|---------------------------------|---------------------------|---------------------------|----------------------------|
| <i>Leptinotarsa decemlineata</i> | 58                              | 75                        | 144                       | 27                         |
| <i>Anoplophora glabripennis</i>  | 52                              | 120                       | 234                       | 72                         |
| <i>Tribolium castaneum</i>       | 49                              | 264                       | 219                       | 72                         |

1278

1279

1280

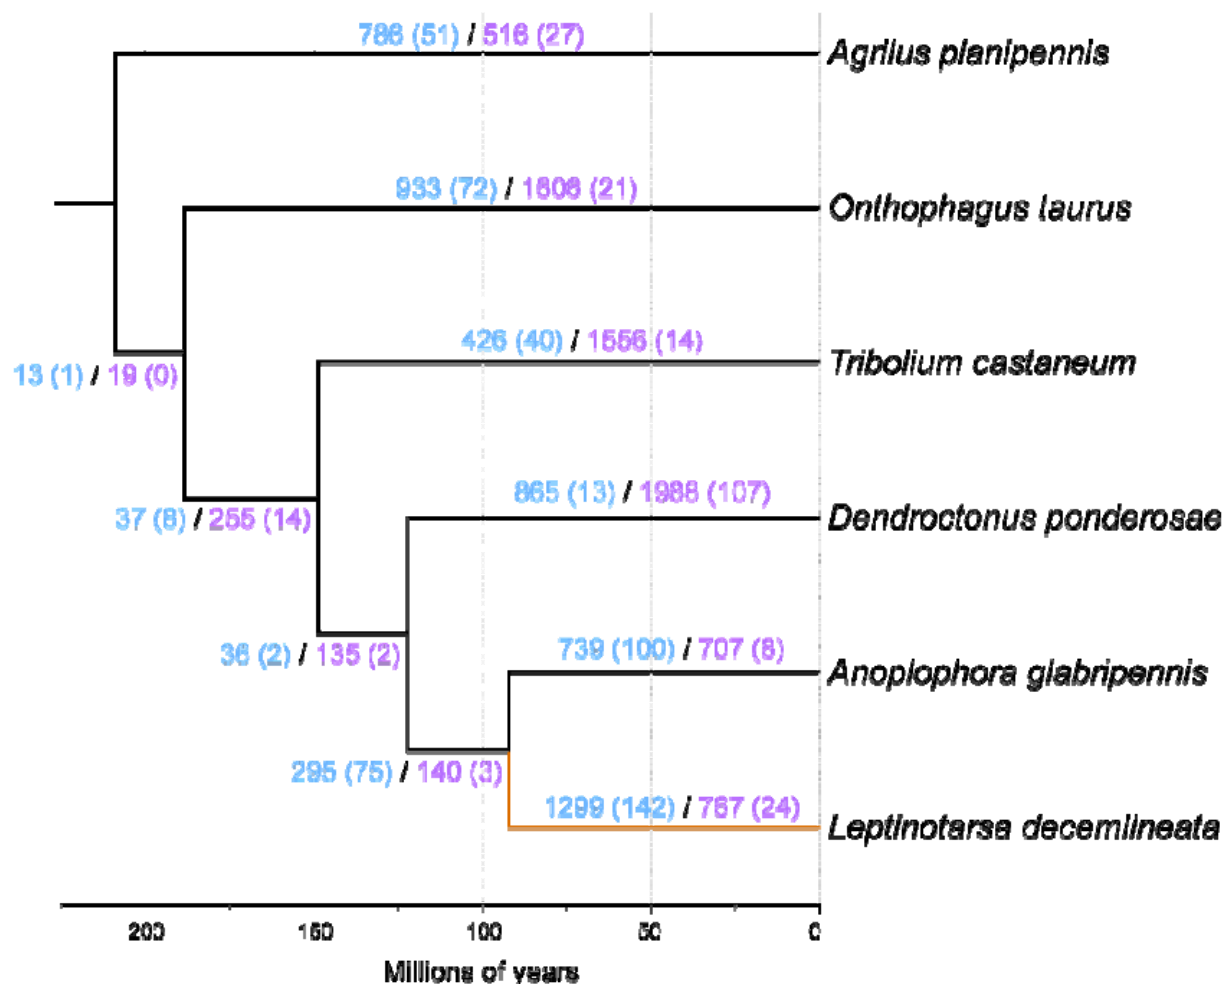

1281  
 1282 **Figure 1.** Ultrametric tree with branch lengths in millions of years for *Leptinotarsa decemlineata*  
 1283 relative to five other Coleoptera genomes. The *L. decemlineata* lineage is shown in orange.  
 1284 Branches are labeled with their length in years (top) and with the number of gene family  
 1285 expansions (blue) and contractions (purple) that occurred on that lineage. Rapid changes for both  
 1286 types are in parentheses.

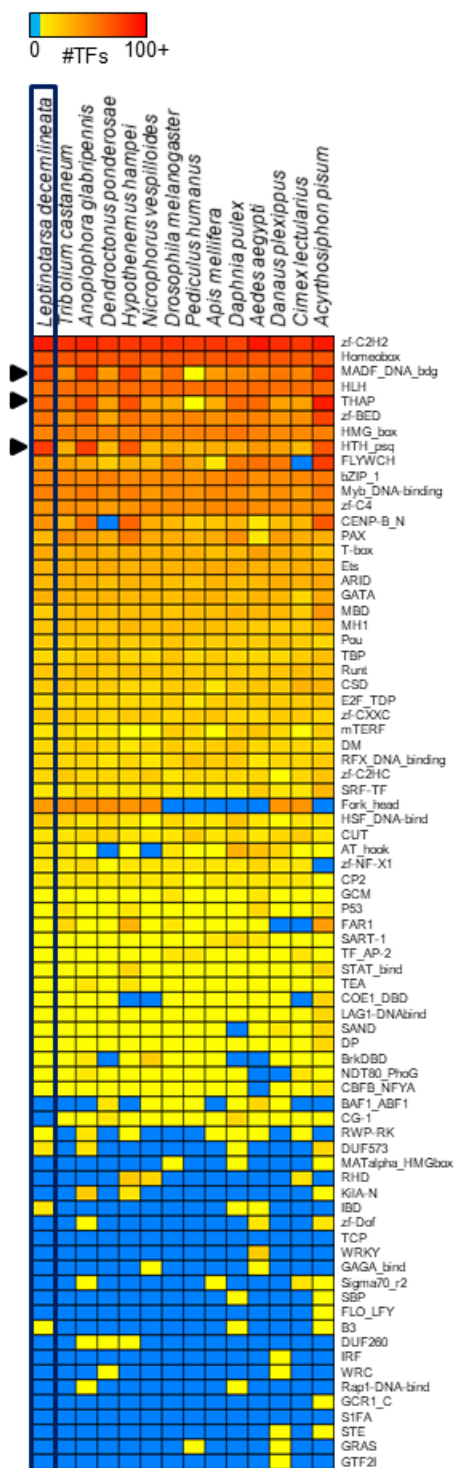

1287  
1288 **Figure 2.** Heatmap distribution of the abundance of transcription factor families in *Leptinotarsa*  
1289 *decemlineata* compared to other insects. Each entry indicates the number of TF genes for the  
1290 given family per genome, based on presence of predicted DNA binding domains. Color scale is  
1291 log (base 2) and the key is depicted at the top (light blue means the TF family is completely  
1292 absent). Families discussed in the main text are indicated by arrows.

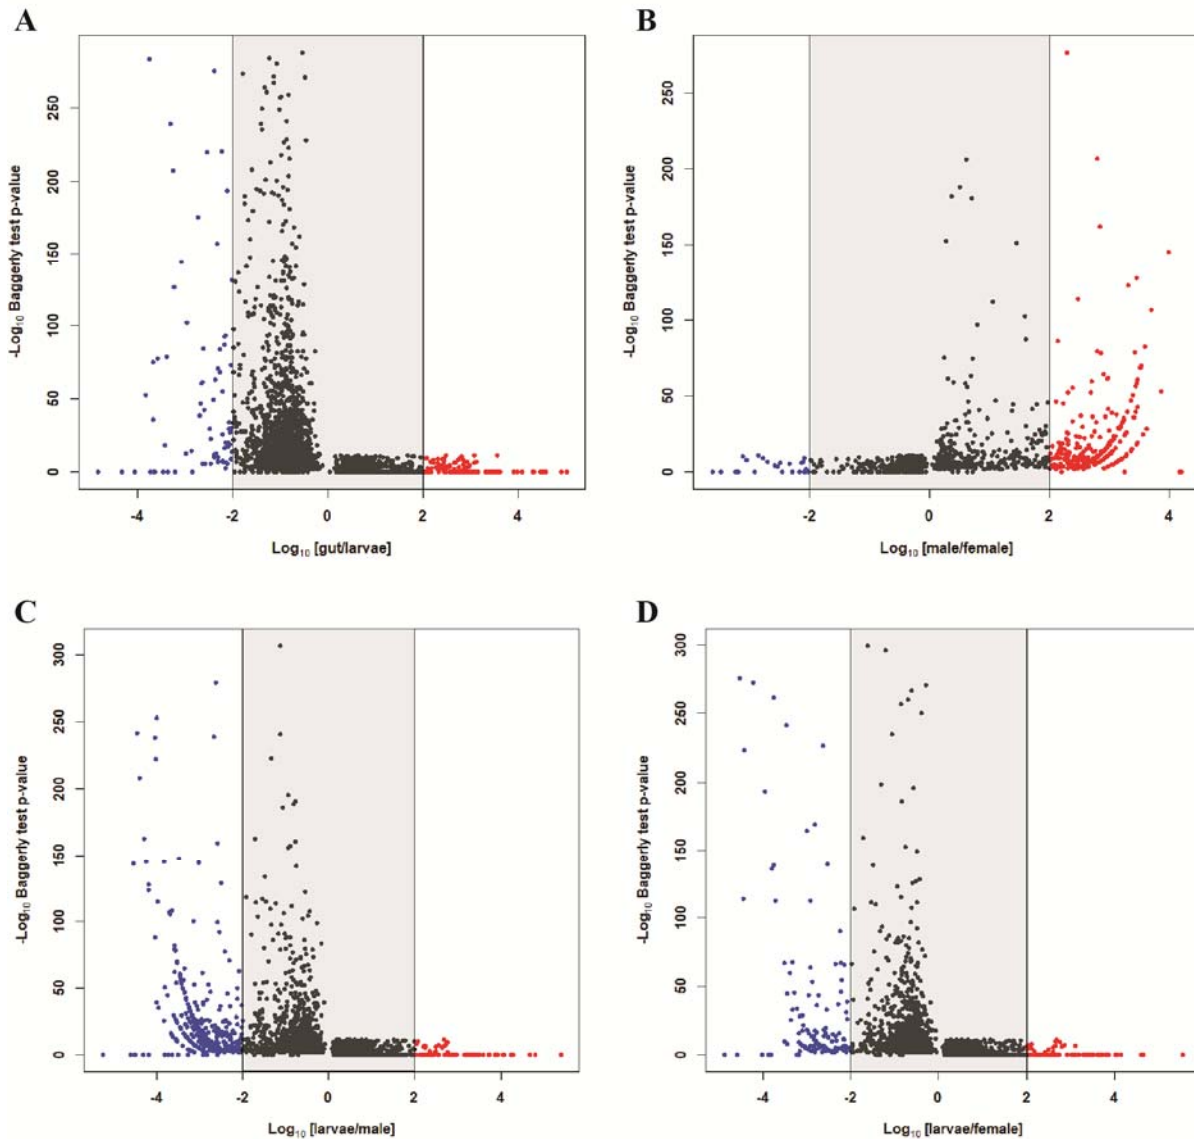

1293  
1294  
1295  
1296  
1297  
1298  
1299  
1300

**Figure 3.** Volcano plots showing statistically significant gene expression differences after Bonferroni correction in *Leptinotarsa decemlineata*. A) Mid-gut tissue versus whole larvae, B) an adult male versus an adult female, C) an adult male versus whole larvae, and D) an adult female versus whole larvae. Points outside the gray area indicate >100-fold-differences in expression. Blue points indicate down-regulated genes and red points indicate up-regulated genes in each contrast.

1301

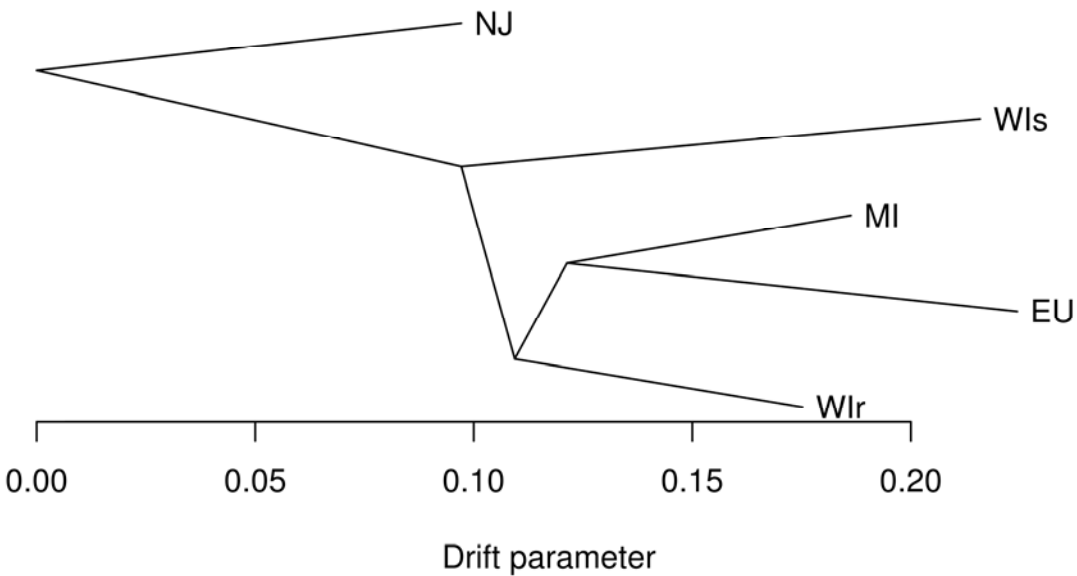

1302

1303

1304

1305

1306

1307

1308

**Figure 4.** Population genetic relationships and relative rates of genetic drift among *Leptinotarsa decemlineata* pest populations based on single nucleotide polymorphism data. Population codes: NJ- New Jersey lab strain, WIs- imidacloprid susceptible population from Arlington, Wisconsin, WIr- imidacloprid resistant population from Hancock, Wisconsin, MI- imidacloprid resistant population from Michigan, and EU- European samples combined from Italy and Russia.

1309

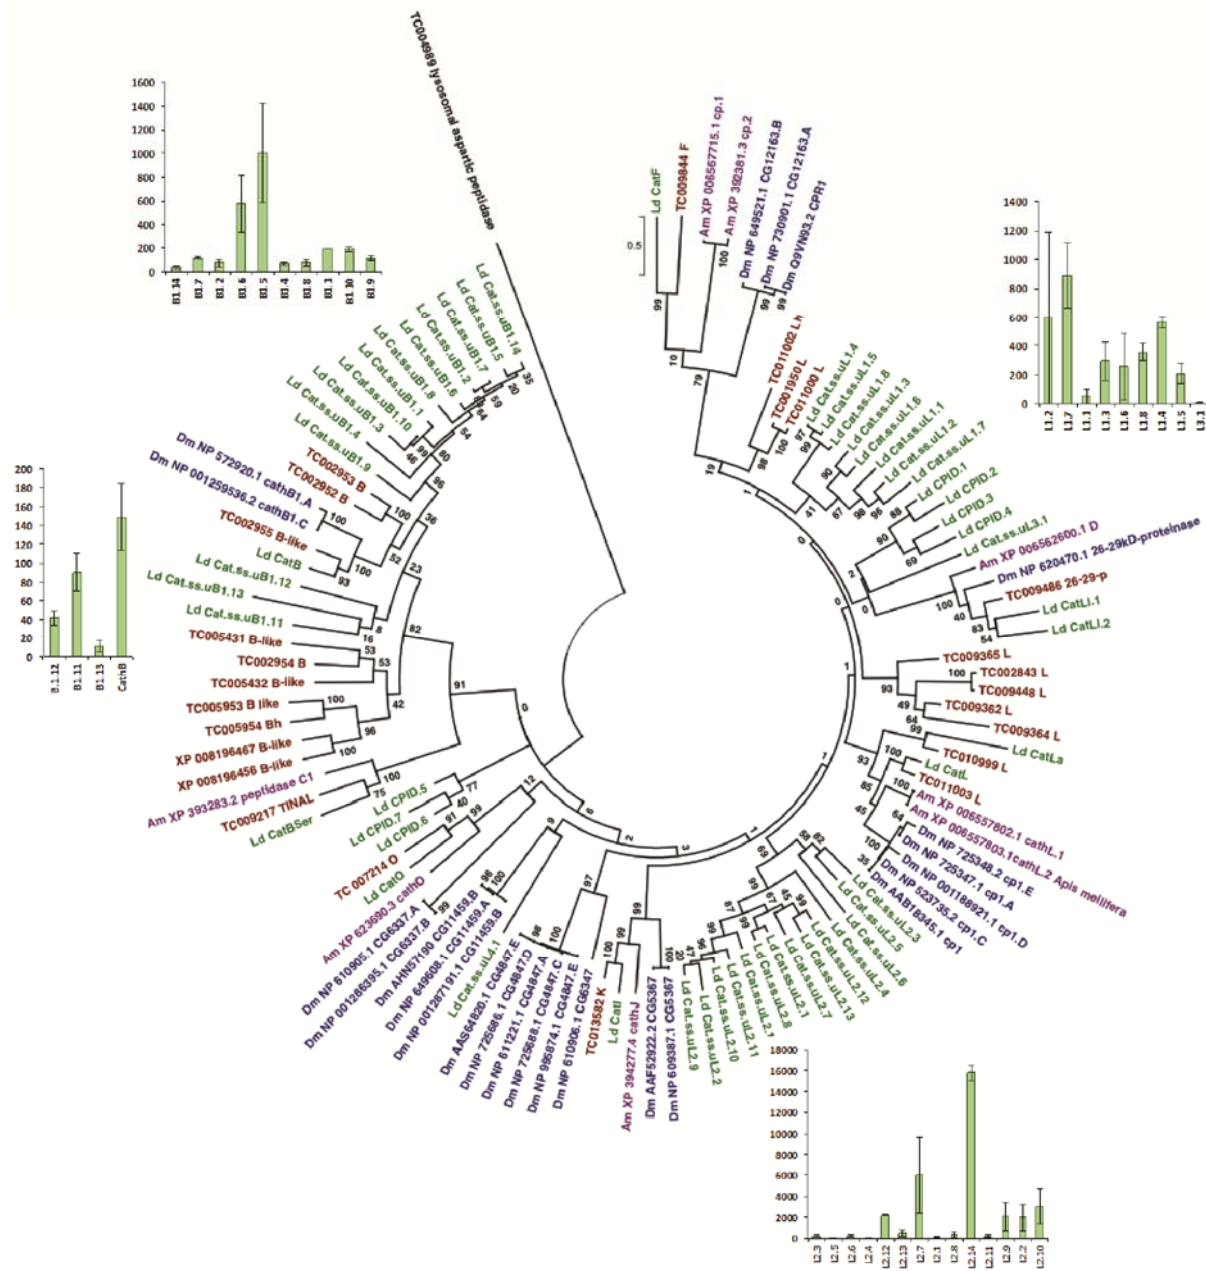

1310  
 1311 **Figure 5.** Phylogenetic relationships of the cysteine peptidase gene family in *Leptinotarsa*  
 1312 *decemlineata* compared to model insects. Species abbreviations are: *L. decemlineata* (Ld, green  
 1313 color), *Drosophila melanogaster* (Dm, blue color), *Apis mellifera* (Am, purple color), and  
 1314 *Tribolium castaneum* (Tc, red color). Mid-gut gene expression (TPM) of highly expressed *L.*  
 1315 *decemlineata* cysteine peptidases is shown as bar graphs across three replicate treatments.  
 1316

1317 **Supplementary Files**

1318 Supplementary File.pdf Supplementary Materials. Contains additional methods, results, figures

1319 and tables.

1320 Supplementary Dataset 1. Precursor miRNA nucleotide sequences.

1321 Supplementary Dataset 2. miRNA predictions (gff format).

1322 Supplementary Dataset 3. Peptide sequences of annotated olfactory genes. Includes the Odorant

1323 Binding Proteins (OBPs), Odorant Receptors (ORs), Gustatory Receptors (GRs), and Ionotropic

1324 Receptors (IRs). The IRs from *Tribolium castaneum* are also included.
